# Supplementary material for: Evaluating active versus passive sources of human brucellosis in Jining City, China
Source: PeerJ. 2021 Jun 22;9:e11637. doi: 10.7717/peerj.11637 (PMC8231335; doi:10.7717/peerj.11637)
Supplement: Supplemental Information 3 [file peerj-09-11637-s003.xlsx]

## Sheet: Sheet1
career	age	Ethnicity	HB	sex	group	cultivation	slaughter	selling	process	Fever	Arthralgia	Debilitation	Hyperhidrosis	Muscle pain	Other	passivegroup	education	id
2	71	1	0	0	0	0	0	0	0	1	1	0	1	0	0	1	1	1
2	76	1	1	1	0	1	0	0	0	0	0	0	1	0	0	1	2	2
1	61	0	0	1	0	0	0	0	1	0	0	0	0	0	0	1	3	3
2	65	1	0	1	1	1	0	0	0	0	1	0	1	0	1		3	4
2	67	1	0	0	1	1	0	0	0	1	1	0	1	0	0		3	5
2	53	1	0	0	0	0	0	0	0	1	1	0	1	0	0	1	2	6
1	30	1	0	1	0	0	0	0	0	1	0	0	0	0	0	1	2	7
1	44	1	0	0	0	0	0	0	0	1	0	0	1	1	0	1	2	8
2	48	1	0	1	0	1	1	0	0	1	1	0	0	0	1	1	1	9
1	69	1	0	1	0	0	0	0	0	1	0	0	1	0	0	1	2	10
1	72	1	1	1	0	0	0	0	0	1	0	0	1	0	0	1	1	11
2	31	1	0	0	0	0	0	0	0	1	1	0	1	1	0	1	2	12
2	39	1	0	1	1	1	1	0	0	1	0	0	1	0	0		2	13
2	32	1	1	1	1	1	0	0	0	1	1	0	1	0	0		2	14
2	47	1	1	1	1	1	1	0	0	0	1	0	0	1	0		2	15
5	22	1	0	1	1	0	0	0	0	1	1	1	1	1	0		3	16
5	12	1	0	1	1	0	0	0	0	1	0	0	0	0	1		2	17
1	52	1	0	1	0	0	0	0	0	1	0	0	0	0	0	1	1	18
2	55	1	0	0	0	1	0	0	0	0	0	0	1	0	0	1	2	19
2	46	1	0	0	1	0	0	0	0	1	0	0	1	0	0		2	20
2	77	1	1	0	1	1	0	0	0	0	0	0	1	0	0		1	21
1	49	1	0	0	1	1	0	0	0	0	0	0	1	0	0		1	22
1	47	1	0	1	1	0	0	0	0	0	0	0	1	0	0		3	23
1	38	1	0	1	0	0	0	0	0	1	0	0	1	0	0	1	3	24
1	48	1	0	0	1	1	0	0	0	1	0	0	1	0	1		3	25
1	50	1	0	0	1	1	0	0	0	0	0	0	1	1	0		2	26
2	48	1	0	1	0	0	0	0	0	1	0	0	0	0	1	1	2	27
2	42	1	0	1	1	1	0	0	0	0	0	1	1	0	0		2	28
2	49	1	0	0	1	1	0	0	0	0	0	0	1	0	0		1	29
2	41	1	0	0	1	1	0	0	0	0	0	0	0	0	0		1	30
1	46	1	0	1	1	0	0	0	0	0	0	0	0	0	0		3	31
2	61	1	0	1	1	1	0	0	0	0	0	0	1	0	0		2	32
1	60	1	0	1	1	0	0	0	1	1	0	0	0	0	0		2	33
2	45	1	0	1	1	1	0	0	0	1	1	0	1	0	0		2	34
2	46	1	0	0	1	1	0	0	0	1	0	0	1	0	1		1	35
2	50	0	0	1	0	1	0	0	0	1	0	0	0	1	1	1	1	36
5	47	1	0	1	0	0	0	0	0	1	0	0	0	0	0	1	3	37
5	17	1	0	0	0	0	0	0	0	1	0	0	0	0	0	1	3	38
2	25	1	0	0	0	0	0	0	0	1	0	0	0	0	0	1	2	39
2	60	1	0	0	0	0	0	0	0	1	0	0	0	0	1	1	1	40
2	12	1	0	0	0	0	0	0	0	1	0	1	0	1	1	1	2	41
5	54	1	0	1	0	0	0	0	0	1	0	0	0	0	0	1	3	42
2	33	0	1	1	0	0	1	0	0	1	0	0	1	1	0	1	2	43
2	33	1	0	1	0	0	0	0	0	1	0	0	0	0	0	1	2	44
2	42	1	0	1	0	0	0	0	0	1	0	0	1	0	1	1	2	45
2	46	1	0	0	0	0	0	0	0	1	0	0	1	1	0	1	1	46
1	38	1	0	1	0	0	0	0	0	0	0	1	1	0	0	1	2	47
2	30	0	0	1	1	0	0	0	1	0	0	0	1	1	1		3	48
2	79	1	0	1	0	0	0	0	0	1	0	0	0	0	0	1	2	49
1	41	1	0	1	0	0	0	0	1	1	0	0	0	0	1	1	2	50
2	70	1	1	0	1	1	0	0	0	0	0	0	0	1	0		1	51
1	54	1	0	0	1	1	0	0	0	1	0	0	0	0	0		1	52
2	80	1	0	1	1	1	0	0	0	1	1	0	0	1	0		1	53
3	53	1	0	0	0	0	0	0	1	1	0	0	1	1	0	1	1	54
1	34	1	0	1	0	0	0	0	0	1	0	0	0	0	0	1	3	55
1	54	1	0	0	0	0	0	0	0	1	0	0	0	0	0	1	3	56
5	2	1	1	1	0	0	0	0	0	1	0	0	0	0	0	1	1	57
1	33	1	0	0	0	0	0	0	0	0	0	0	0	1	0	1	3	58
1	77	1	0	1	0	0	0	0	0	1	0	0	0	0	1	1	2	59
5	13	1	0	1	0	0	0	0	0	1	0	0	0	0	1	1	2	60
2	58	1	0	0	0	1	0	0	0	1	0	0	1	1	1	1	2	61
1	30	1	0	1	1	0	0	0	1	1	0	0	0	0	0		2	62
2	68	1	0	1	1	1	0	0	0	1	0	0	0	1	0		1	63
2	46	1	0	1	1	1	0	0	0	0	0	0	1	0	0		2	64
2	45	1	0	0	1	0	0	0	0	0	0	0	1	0	0		2	65
2	51	1	0	0	1	0	0	0	1	0	1	0	1	1	0		1	66
2	43	1	0	0	0	0	0	0	0	1	0	0	0	0	0	1	2	67
2	56	1	0	0	1	0	0	0	0	0	0	0	0	0	0		1	68
2	73	1	0	1	0	1	0	0	0	0	0	0	1	0	0	1	1	69
1	34	1	0	1	1	1	0	0	0	0	0	0	0	0	0		3	70
1	37	1	0	0	1	1	0	0	0	0	0	0	0	0	0		1	71
1	58	1	0	1	1	1	0	0	0	0	0	0	0	0	0		3	72
1	38	1	0	1	1	1	0	0	0	0	0	0	0	0	0		3	73
1	27	1	0	1	1	1	0	0	0	0	0	0	0	0	0		3	74
1	52	1	0	0	1	1	0	0	0	0	0	1	1	1	0		2	75
4	58	1	0	1	1	1	0	0	0	0	0	0	0	0	0		3	76
1	46	1	0	0	1	1	0	0	0	0	0	0	0	0	0		2	77
1	48	1	0	0	1	1	0	0	0	0	0	0	1	0	0		2	78
1	49	1	0	0	1	1	0	0	0	0	0	0	0	1	0		2	79
1	46	1	0	0	1	1	0	0	0	0	0	0	0	1	0		1	80
2	55	1	0	1	1	1	0	0	0	0	1	0	1	1	0		3	81
2	67	1	1	1	1	1	0	0	0	1	1	1	1	1	0		1	82
2	50	1	0	1	0	0	0	0	0	1	1	1	0	0	0	1	1	83
3	18	1	0	1	0	0	0	0	1	1	1	1	0	0	0	1	2	84
2	28	1	0	1	1	1	0	0	0	1	1	1	0	0	0		3	85
2	56	1	0	1	1	1	0	0	0	1	1	1	0	0	0		2	86
2	69	1	1	0	1	1	0	0	0	1	1	1	1	1	0		1	87
2	72	1	0	1	1	1	0	0	0	1	1	1	0	0	0		1	88
2	58	1	0	1	1	1	0	0	0	0	1	0	0	1	1		2	89
2	53	1	0	0	1	0	0	0	0	1	0	0	1	0	0		1	90
2	45	1	0	0	1	1	0	0	0	1	0	0	0	0	0		2	91
5	51	1	0	1	1	0	0	0	0	1	0	0	0	1	1		3	92
2	59	1	0	0	1	1	0	0	0	1	0	0	1	0	0		1	93
1	54	1	0	1	1	0	0	0	0	1	0	0	0	1	0		1	94
2	65	1	1	1	1	1	0	0	0	1	0	0	0	1	0		1	95
2	25	1	1	0	1	1	0	0	0	1	0	0	0	1	0		1	96
5	12	1	0	0	1	1	0	0	0	1	0	0	0	0	0		2	97
1	26	1	1	1	1	0	1	0	0	1	0	0	0	1	0		2	98
2	70	1	1	1	1	1	0	0	0	1	1	1	1	1	0		1	99
2	49	0	0	1	1	1	1	0	0	1	1	0	0	0	0		2	100
1	49	1	0	0	1	0	0	0	0	1	1	0	0	0	0		3	101
2	44	1	1	1	1	1	0	0	0	1	0	0	0	1	0		2	102
5	29	1	0	0	1	0	0	0	0	1	1	0	1	0	0		3	103
5	10	1	1	0	1	1	0	0	0	1	1	0	0	0	0		1	104
2	51	1	0	0	1	1	0	0	0	0	0	0	1	1	0		2	105
2	62	1	0	1	1	1	0	0	0	0	0	0	1	1	0		2	106
2	39	1	0	0	1	1	0	0	0	1	0	1	1	1	0		2	107
5	52	0	0	1	1	0	1	0	0	1	0	0	0	1	0		1	108
1	72	1	0	1	1	0	0	0	0	1	1	0	1	1	0		2	109
2	45	1	1	0	1	1	0	0	0	0	0	0	0	0	0		2	110
2	35	1	0	1	1	1	0	0	0	0	0	0	0	0	0		2	111
2	25	1	0	1	1	1	0	0	0	0	0	0	0	0	0		2	112
2	45	1	1	0	1	1	0	0	0	0	0	0	0	0	0		2	113
2	52	1	1	0	1	1	0	0	0	0	0	0	0	0	0		2	114
2	51	1	0	1	1	1	0	0	0	0	0	0	0	0	0		2	115
2	27	1	0	1	1	1	0	0	0	0	0	0	0	0	0		2	116
2	75	1	0	0	1	1	0	0	0	0	0	0	0	0	0		2	117
2	35	1	0	0	1	1	0	0	0	0	0	0	0	0	0		2	118
2	46	1	0	1	1	1	0	0	0	0	0	0	0	0	0		2	119
2	57	1	1	1	1	1	0	0	0	0	0	0	0	0	0		2	120
2	52	1	0	1	1	1	0	0	0	0	0	0	0	0	0		2	121
2	53	1	1	1	1	1	0	0	0	0	0	0	0	0	0		2	122
2	54	1	0	1	1	1	0	0	0	0	0	0	0	0	0		2	123
2	63	1	0	1	1	1	0	0	0	0	0	0	0	0	0		2	124
2	46	1	0	1	1	1	0	0	0	0	0	0	0	0	0		2	125
2	52	1	0	0	1	1	0	0	0	0	0	0	0	0	0		2	126
2	53	1	0	1	1	1	0	0	0	0	0	0	0	0	0		2	127
2	51	1	0	1	1	1	0	0	0	0	0	0	0	0	0		2	128
2	48	1	0	1	1	1	0	0	0	0	0	0	0	0	0		2	129
2	49	1	0	0	1	1	0	0	0	0	0	0	0	0	0		2	130
2	51	1	0	1	1	1	0	0	0	0	0	0	0	0	0		2	131
2	49	1	0	0	1	1	0	0	0	0	0	0	0	0	0		2	132
2	45	1	0	0	1	1	0	0	0	0	0	0	0	0	0		2	133
2	46	1	0	0	1	1	0	0	0	0	0	0	0	0	0		2	134
2	42	1	0	1	1	1	0	0	0	0	0	0	0	0	0		2	135
2	35	1	0	1	1	1	0	0	0	0	0	0	0	0	0		2	136
2	46	1	0	1	1	1	0	0	0	0	0	0	0	0	0		2	137
2	45	1	1	1	1	1	0	0	0	0	0	0	0	0	0		2	138
2	43	1	1	1	1	1	1	0	0	1	1	0	1	1	0		2	139
1	29	1	0	1	1	1	0	0	0	0	0	0	0	0	0		3	140
1	42	1	0	1	1	1	0	0	0	0	0	0	1	0	0		3	141
1	29	1	0	1	1	1	0	0	0	0	0	0	0	0	0		3	142
1	43	1	1	1	1	1	0	0	0	1	0	0	1	0	0		2	143
1	29	1	0	1	1	1	0	0	0	0	0	0	0	0	0		3	144
4	48	1	0	1	1	1	0	0	0	0	0	1	1	1	0		2	145
1	38	1	0	1	1	1	0	0	0	0	0	0	1	0	0		2	146
4	52	1	0	1	1	1	0	0	0	0	0	0	1	0	0		3	147
4	27	1	0	1	1	1	0	0	0	0	1	0	1	0	0		3	148
1	45	1	0	1	1	1	0	0	0	0	0	0	0	0	0		2	149
1	30	1	0	1	1	1	0	0	0	0	0	0	0	0	0		3	150
1	56	1	0	1	1	1	0	0	0	0	0	0	0	0	0		2	151
1	25	1	0	1	1	1	0	0	0	0	0	0	0	0	0		2	152
1	26	1	0	0	1	1	0	0	0	0	0	0	0	0	0		2	153
1	42	1	0	0	1	1	0	0	0	0	0	0	0	0	0		2	154
1	46	1	0	1	1	1	0	0	0	0	0	1	1	0	0		2	155
1	33	1	0	0	1	1	0	0	0	0	0	0	0	0	0		2	156
1	37	1	0	0	1	1	0	0	0	0	0	0	0	0	0		3	157
1	21	1	0	0	1	1	0	0	0	0	0	0	0	0	0		3	158
1	31	1	0	1	1	0	0	1	0	0	0	0	0	0	0		3	159
1	45	1	0	1	1	0	0	1	0	0	0	0	0	0	0		3	160
1	32	1	0	1	1	1	0	0	0	1	1	1	1	1	0		2	161
2	69	1	0	1	1	1	0	0	0	1	1	1	0	0	0		1	162
2	75	1	0	1	0	1	0	0	0	1	1	1	0	0	0	1	1	163
5	16	1	0	1	0	0	0	0	0	1	0	0	0	0	0	1	3	164
2	61	1	0	1	1	1	0	0	0	1	1	0	1	1	1		1	165
1	20	1	0	1	1	0	0	0	0	0	0	0	1	0	0		2	166
2	67	1	0	0	1	0	0	0	0	0	0	0	1	0	0		1	167
2	60	1	0	1	0	0	0	0	0	1	0	0	1	0	0	1	2	168
2	76	1	0	1	1	0	0	0	0	0	0	0	1	0	0		1	169
2	52	1	0	1	1	0	0	1	0	0	0	0	1	0	0		2	170
2	52	1	0	0	1	0	0	1	0	0	0	0	0	0	0		2	171
2	73	1	1	1	0	1	0	0	0	0	0	0	1	1	0	1	1	172
1	61	1	0	1	1	0	0	0	1	0	0	1	0	0	0		1	173
2	41	1	1	1	1	1	0	0	0	1	0	0	0	0	0		3	174
1	56	1	0	1	0	0	0	0	0	1	0	1	0	0	0	1	1	175
1	33	1	0	0	1	0	0	0	0	0	0	0	0	1	0		3	176
1	60	1	0	1	0	0	0	0	0	1	0	0	0	0	0	1	3	177
2	52	1	1	1	0	1	0	0	0	0	0	0	1	0	0	1	2	178
1	47	1	0	1	1	0	0	0	0	0	0	0	1	0	0		2	179
3	56	1	0	1	1	0	0	0	0	0	0	1	0	0	0		3	180
2	47	1	0	1	1	0	0	1	0	0	0	0	1	0	0		1	181
2	42	1	1	1	1	0	1	0	0	1	0	0	0	0	0		2	182
2	68	1	0	1	0	1	0	0	0	1	0	0	0	0	0	1	1	183
1	29	1	0	1	0	0	0	0	0	0	1	0	0	0	0	1	3	184
2	35	1	0	1	1	0	0	1	0	1	0	0	1	0	0		2	185
1	31	1	0	1	1	0	0	0	0	1	0	0	1	0	0		2	186
2	61	1	1	1	1	0	1	0	0	0	0	1	0	0	0		3	187
1	66	1	0	0	1	0	0	0	0	1	0	1	0	0	0		3	188
5	26	1	0	1	1	0	0	0	0	1	0	0	0	0	0		3	189
2	40	1	0	0	1	0	0	0	0	1	0	0	0	0	0		2	190
1	40	1	0	1	1	0	0	0	0	1	0	0	0	0	0		3	191
2	53	1	1	1	1	1	0	0	0	1	0	0	0	0	0		2	192
2	52	1	0	0	1	1	0	0	0	1	0	1	0	0	0		1	193
2	78	1	0	1	1	0	0	0	0	1	0	0	1	0	1		1	194
2	58	1	0	1	1	0	1	0	0	0	0	1	1	0	0		1	195
5	46	1	0	0	1	0	0	0	0	1	0	0	0	1	1		2	196
2	65	1	0	1	0	1	0	0	0	1	0	1	0	0	0	1	1	197
5	13	1	0	0	0	0	0	0	0	0	0	0	1	0	0	1	2	198
2	37	1	0	1	1	0	1	0	0	0	0	1	0	0	0		2	199
2	58	1	1	1	1	0	1	0	0	1	0	1	0	0	0		1	200
2	52	1	0	0	1	0	1	0	0	0	1	1	0	0	0		1	201
1	63	1	0	1	0	0	0	0	0	1	0	0	0	0	1	1	1	202
2	61	1	0	1	0	0	0	0	0	1	0	1	0	1	0	1	3	203
1	29	1	0	1	1	1	0	0	0	1	1	0	1	1	0		3	204
1	44	1	1	1	0	1	0	0	0	1	0	0	0	0	0	1	2	205
2	55	1	1	1	1	0	1	0	0	1	0	0	1	0	0		1	206
5	16	1	0	0	1	0	0	0	0	1	0	0	0	0	0		3	207
2	27	1	0	0	1	0	0	0	0	1	0	0	1	0	0		2	208
2	25	1	0	1	1	0	0	0	0	0	0	0	0	0	0		2	209
2	62	1	0	1	1	1	0	0	0	0	0	0	1	0	0		1	210
2	65	1	1	1	1	0	0	0	0	0	0	0	1	0	0		1	211
2	46	1	0	0	1	1	0	0	0	0	0	0	0	0	0		2	212
2	49	1	1	1	1	0	1	0	0	1	0	0	1	0	0		2	213
2	42	1	0	0	1	0	1	0	0	0	0	0	1	1	0		1	214
2	1	1	0	0	1	0	0	0	0	1	0	0	0	0	0		1	215
2	56	1	0	1	1	1	0	0	0	1	0	0	1	0	0		2	216
2	33	1	1	1	0	0	0	0	1	1	0	0	1	0	0	1	2	217
5	55	1	0	0	0	0	0	0	0	1	0	1	0	0	0	1	3	218
5	18	1	0	1	1	0	0	0	0	1	0	0	1	0	1		3	219
5	16	1	0	1	1	1	0	0	0	0	0	0	0	0	0		3	220
2	75	1	1	1	1	1	0	0	0	0	0	0	0	0	0		1	221
2	70	1	1	0	1	1	0	0	0	0	0	0	0	0	0		1	222
1	61	1	0	1	0	0	0	0	0	1	0	0	1	0	0	1	1	223
2	68	1	1	1	1	1	0	0	0	0	0	0	1	0	0		1	224
1	29	1	0	1	0	0	0	0	0	1	0	0	1	1	1	1	3	225
2	61	1	0	1	1	1	0	0	0	0	0	1	0	0	0		1	226
2	42	1	0	1	0	1	0	0	0	1	0	0	0	0	0	1	1	227
5	12	1	0	1	1	1	0	0	0	1	0	0	0	0	0		1	228
2	45	1	1	0	1	1	0	0	0	1	0	0	1	0	0		2	229
2	41	1	1	0	1	0	0	0	0	0	0	0	0	0	0		2	230
1	41	0	0	1	1	0	1	0	0	0	0	0	0	0	0		3	231
1	49	0	0	1	1	0	1	0	0	0	1	1	0	0	0		1	232
2	63	1	0	0	1	0	0	0	0	1	0	1	1	1	0		1	233
5	51	1	0	0	1	0	1	0	0	0	0	1	1	1	0		1	234
1	54	1	0	1	1	0	0	0	0	0	1	0	0	1	0		1	235
2	61	1	1	1	1	0	0	0	0	1	1	1	0	0	1		3	236
2	26	1	1	1	1	1	0	0	0	0	1	1	0	1	0		2	237
2	42	1	1	1	1	0	0	0	0	1	0	1	0	1	0		2	238
2	29	1	0	1	1	0	0	0	0	0	0	1	1	1	0		2	239
2	64	1	0	0	1	1	0	0	0	0	0	0	1	1	0		1	240
2	30	1	0	1	1	1	0	0	0	0	0	1	0	1	0		3	241
2	47	1	1	1	1	1	0	0	0	0	1	0	0	1	0		2	242
2	53	1	0	1	1	1	0	0	0	0	1	0	1	0	0		2	243
2	60	1	1	1	1	1	0	0	0	1	1	0	1	1	0		2	244
2	35	1	1	0	1	1	0	0	0	0	1	0	0	1	0		2	245
2	46	1	0	0	1	0	0	0	0	0	1	1	1	0	0		2	246
2	47	1	1	1	1	1	0	0	0	0	1	0	0	1	0		2	247
2	68	1	1	1	1	1	0	0	0	1	1	0	1	1	0		1	248
2	44	1	1	0	1	1	0	0	0	0	1	1	0	0	0		1	249
2	36	1	0	0	1	0	0	0	0	0	0	1	0	1	0		2	250
2	34	1	0	1	1	1	0	0	0	0	0	0	1	1	0		2	251
2	33	1	1	1	1	1	0	0	0	0	1	1	0	0	0		2	252
2	37	1	0	0	1	0	1	0	0	0	0	1	1	0	0		2	253
2	47	1	0	0	1	0	1	0	0	0	1	0	1	0	0		1	254
2	51	1	1	1	1	0	1	0	0	1	0	1	0	1	1		2	255
2	70	1	0	1	1	0	1	0	0	1	0	0	0	1	0		2	256
2	54	1	0	1	1	0	0	1	0	0	1	0	1	0	0		2	257
2	53	1	0	0	1	0	0	1	0	0	1	1	0	1	0		2	258
2	31	1	1	1	1	0	0	1	0	1	0	0	0	1	0		2	259
2	50	1	0	1	1	0	1	0	0	1	0	0	0	0	0		1	260
1	35	1	0	1	1	0	0	0	0	1	0	1	1	1	0		3	261
2	55	1	0	1	1	1	0	0	0	1	1	0	0	1	1		2	262
2	52	1	0	1	1	1	0	1	0	0	0	1	0	0	0		2	263
2	36	1	0	1	1	1	0	0	0	0	0	1	1	0	1		2	264
2	36	1	0	1	1	1	0	0	0	1	0	0	0	1	0		2	265
2	55	1	1	1	1	0	0	1	0	1	1	0	0	1	0		2	266
2	37	1	1	1	1	0	0	1	0	1	1	0	1	1	0		3	267
1	40	1	0	0	1	0	0	0	0	1	0	0	0	0	0		3	268
2	46	1	0	1	1	1	0	1	0	1	1	0	0	0	0		2	269
2	47	1	0	0	1	1	0	1	0	1	1	0	0	0	0		2	270
2	55	1	1	0	1	1	1	0	0	1	1	0	1	0	0		2	271
5	30	1	0	1	1	0	0	0	0	1	0	0	0	0	0		3	272
2	44	1	0	1	1	0	0	0	0	1	1	0	1	1	0		2	273
3	53	1	0	1	1	1	0	0	0	1	0	1	0	0	0		2	274
2	49	1	0	0	1	1	0	0	0	0	0	1	1	0	0		1	275
2	74	1	0	1	1	1	0	0	0	1	0	0	1	0	0		1	276
2	53	1	0	1	1	0	0	1	0	1	0	1	0	1	0		1	277
2	51	1	0	1	1	0	0	1	0	1	0	0	1	1	0		2	278
2	22	1	1	1	1	0	0	1	0	1	0	0	0	0	0		1	279
2	81	1	0	1	1	1	0	0	0	1	1	0	0	1	0		1	280
2	51	1	0	1	1	1	0	0	0	1	1	0	1	0	0		2	281
2	51	1	0	1	1	0	0	1	0	1	0	1	1	0	0		1	282
2	49	1	0	1	1	0	1	0	0	1	1	0	1	0	0		2	283
2	33	1	1	1	1	0	1	0	0	1	0	1	0	0	0		2	284
2	56	1	1	1	1	0	1	0	0	1	1	0	1	1	0		1	285
2	55	1	1	0	1	1	0	0	0	1	1	0	0	0	0		2	286
2	67	1	0	0	1	1	0	0	0	0	1	0	0	1	0		1	287
2	55	1	0	0	1	1	0	0	0	1	1	1	1	1	0		1	288
2	59	1	0	1	1	1	0	0	0	1	1	1	1	1	0		1	289
5	15	1	0	0	1	0	0	0	0	1	0	0	0	0	0		2	290
2	56	1	0	1	0	0	0	0	0	1	0	0	0	1	0	1	2	291
1	55	1	0	1	1	1	0	0	0	1	1	1	1	1	0		2	292
2	59	1	1	1	1	1	0	0	0	1	1	1	1	1	0		2	293
1	59	1	0	1	0	0	0	0	0	1	1	1	1	1	0	1	2	294
2	64	1	0	1	1	1	0	0	0	1	1	1	1	1	0		1	295
1	31	1	0	1	1	1	0	0	0	0	0	1	1	1	0		2	296
1	46	1	0	1	1	1	0	0	0	0	1	0	1	1	0		2	297
1	46	1	0	1	1	1	0	0	0	0	0	0	1	0	0		2	298
1	21	1	0	1	1	0	0	1	0	0	0	0	0	0	0		3	299
1	31	1	0	0	1	1	0	0	0	0	0	0	0	0	0		3	300
1	43	1	0	1	1	0	0	1	0	0	0	0	0	0	0		3	301
1	30	1	0	1	1	1	0	0	0	0	0	0	0	0	0		3	302
1	46	1	0	1	1	1	0	0	0	0	0	0	0	0	0		3	303
1	27	1	0	0	1	1	0	0	0	0	0	0	0	0	0		3	304
1	46	1	0	1	1	1	0	0	0	0	0	0	0	0	0		2	305
1	30	1	0	1	1	0	0	1	0	0	0	0	0	0	0		2	306
1	25	1	0	1	1	0	0	1	0	0	0	0	0	0	0		3	307
1	38	1	0	1	1	0	0	1	0	0	0	0	0	0	0		3	308
1	33	1	0	1	1	1	0	0	0	0	0	0	0	0	0		3	309
1	39	1	0	1	1	1	0	0	0	0	0	0	0	0	0		3	310
1	31	1	1	1	1	1	0	0	0	0	0	0	0	0	1		2	311
1	43	1	0	1	1	1	0	0	0	1	1	1	1	1	0		2	312
1	38	1	0	1	1	0	0	1	0	0	0	0	0	0	0		3	313
1	31	1	0	0	1	1	0	0	0	0	0	0	0	0	0		3	314
1	47	1	0	1	0	1	0	0	0	0	0	0	0	0	0	0	2	315
1	41	1	0	1	0	1	0	0	0	0	0	0	0	0	0	0	2	316
1	31	1	0	1	0	1	0	0	0	0	0	0	0	0	0	0	3	317
1	52	1	0	1	0	1	0	0	0	0	0	0	0	0	0	0	2	318
1	48	1	0	1	0	1	0	0	0	0	0	0	0	0	0	0	2	319
1	43	1	0	1	0	1	0	0	0	0	0	0	0	0	0	0	2	320
1	45	1	0	1	0	0	0	1	0	0	0	0	0	0	0	0	2	321
1	54	1	0	1	0	0	0	1	0	0	0	0	0	0	0	0	2	322
1	56	1	0	1	0	1	0	0	0	0	0	0	0	0	0	0	2	323
1	38	1	0	1	0	0	0	1	0	0	0	0	0	0	0	0	2	324
1	34	1	0	1	0	0	0	1	0	0	0	0	0	0	0	0	2	325
1	61	1	0	1	0	1	0	0	0	0	0	0	0	0	0	0	2	326
1	45	1	0	1	0	1	0	0	0	0	0	0	0	0	0	0	2	327
1	43	1	0	1	0	1	0	0	0	0	0	0	0	0	0	0	2	328
1	48	1	0	1	0	1	0	0	0	0	0	0	0	0	0	0	2	329
1	54	1	0	1	0	1	0	0	0	0	0	0	0	0	0	0	2	330
1	52	1	0	1	0	0	0	1	0	0	0	0	0	0	0	0	2	331
1	47	1	0	1	0	0	0	1	0	0	0	0	0	0	0	0	2	332
1	30	1	0	1	0	0	0	1	0	0	0	0	0	0	0	0	2	333
1	49	1	0	0	0	1	0	0	0	0	0	0	0	0	0	0	2	334
1	50	1	0	0	0	1	0	0	0	0	0	0	0	0	0	0	2	335
1	48	1	0	0	0	1	0	0	0	0	0	0	0	0	0	0	2	336
1	59	1	0	1	0	0	0	1	0	0	0	0	0	0	0	0	2	337
1	42	1	0	0	0	1	0	0	0	0	0	0	0	0	0	0	2	338
1	42	1	0	0	0	1	0	0	0	0	0	0	0	0	0	0	2	339
1	49	1	0	1	0	1	0	0	0	0	0	0	0	0	0	0	2	340
1	44	1	0	0	0	1	0	0	0	0	0	0	0	0	0	0	2	341
1	49	1	0	0	0	1	0	0	0	0	0	0	0	0	0	0	2	342
1	59	1	0	1	0	1	0	0	0	0	0	0	0	0	0	0	2	343
1	45	1	0	1	0	1	0	0	0	0	0	0	0	0	0	0	2	344
1	49	1	0	1	0	1	0	0	0	0	0	0	0	0	0	0	2	345
1	50	1	0	1	0	1	0	0	0	0	0	0	0	0	0	0	2	346
4	59	1	0	1	0	1	0	0	0	0	0	0	0	0	0	0	2	347
1	59	1	0	1	0	1	0	0	0	0	0	0	0	0	0	0	2	348
1	59	1	0	1	0	1	0	0	0	0	0	0	0	0	0	0	2	349
1	52	1	0	1	0	1	0	0	0	0	0	0	0	0	0	0	2	350
1	28	1	0	1	0	1	0	0	0	0	0	0	0	0	0	0	2	351
1	21	1	0	1	0	1	0	0	0	0	0	0	0	0	0	0	2	352
1	30	1	0	1	0	1	0	0	0	0	0	0	0	0	0	0	2	353
1	21	1	1	1	0	1	0	0	0	0	0	0	0	0	0	0	2	354
1	29	1	0	1	0	1	0	0	0	0	0	0	0	0	0	0	2	355
1	34	1	0	1	0	1	0	0	0	0	0	0	0	0	0	0	2	356
1	43	1	1	1	0	1	0	0	0	0	0	0	0	0	0	0	2	357
1	52	1	0	0	0	0	0	1	0	0	0	0	0	0	0	0	2	358
1	34	1	0	1	0	1	0	0	0	0	0	0	0	0	0	0	2	359
1	45	1	0	1	0	1	0	0	0	0	0	0	0	0	0	0	2	360
1	45	1	0	1	0	1	0	0	0	0	0	0	0	0	0	0	2	361
1	48	1	0	1	0	1	0	0	0	0	0	0	0	0	0	0	2	362
1	54	1	0	0	0	1	0	0	0	0	0	0	0	0	0	0	2	363
4	48	1	0	1	0	1	0	0	0	0	0	0	0	0	0	0	2	364
1	54	1	0	1	0	1	0	0	0	0	0	0	0	0	0	0	2	365
1	40	1	0	1	0	0	0	1	0	0	0	0	0	0	0	0	2	366
1	56	1	0	1	0	1	0	0	0	0	0	0	0	0	0	0	2	367
1	42	1	0	1	0	1	0	0	0	0	0	0	0	0	0	0	2	368
1	56	1	0	1	0	1	0	0	0	0	0	0	0	0	0	0	2	369
1	59	1	0	1	0	0	0	1	0	0	0	0	0	0	0	0	2	370
1	38	1	0	1	0	0	0	1	0	0	0	0	0	0	0	0	2	371
1	54	1	0	1	0	1	0	0	0	0	0	0	0	0	0	0	2	372
4	56	1	0	1	0	1	0	0	0	0	0	0	0	0	0	0	2	373
1	43	1	0	1	0	1	0	0	0	0	0	0	0	0	0	0	2	374
1	51	1	0	1	0	1	0	0	0	0	0	0	0	0	0	0	2	375
1	33	1	0	1	0	1	0	0	0	0	0	0	0	0	0	0	2	376
1	39	1	1	1	0	1	0	0	0	0	0	1	0	1	0	0	2	377
1	29	1	0	1	0	1	0	0	0	0	0	0	0	0	0	0	2	378
1	29	1	0	1	0	1	0	0	0	0	0	0	0	0	0	0	2	379
1	22	1	1	1	0	1	0	0	0	0	0	1	0	1	0	0	2	380
4	59	1	0	1	0	1	0	0	0	0	0	0	0	0	0	0	2	381
1	51	1	0	1	0	1	0	0	0	0	0	0	0	0	0	0	2	382
1	36	1	0	1	0	1	0	0	0	0	0	0	0	0	0	0	2	383
1	56	1	0	1	0	1	0	0	0	0	0	0	0	0	0	0	2	384
1	59	1	0	1	0	1	0	0	0	0	0	0	0	0	0	0	2	385
1	37	1	0	1	0	1	0	0	0	0	0	0	0	0	0	0	2	386
4	56	1	0	1	0	1	0	0	0	0	0	0	0	0	0	0	2	387
4	31	1	0	1	0	1	0	0	0	0	0	0	0	0	0	0	2	388
4	58	1	0	1	0	1	0	0	0	0	0	0	0	0	0	0	2	389
1	19	1	0	0	0	1	0	0	0	0	0	0	0	0	0	0	2	390
1	52	1	0	1	0	1	0	0	0	0	0	0	0	0	0	0	2	391
1	56	1	0	1	0	1	0	0	0	0	0	0	0	0	0	0	2	392
1	56	1	0	1	0	1	0	0	0	0	0	0	0	0	0	0	2	393
1	31	1	1	1	0	1	0	0	0	0	0	0	0	0	0	0	2	394
1	50	1	0	1	0	1	0	0	0	0	0	0	0	0	0	0	2	395
1	38	1	0	1	0	0	0	1	0	0	0	0	0	0	0	0	2	396
1	45	1	0	1	0	0	0	1	0	0	0	0	0	0	0	0	2	397
1	33	1	0	1	0	1	0	0	0	0	0	0	0	0	0	0	2	398
1	21	1	0	1	0	0	0	1	0	0	0	0	0	0	0	0	2	399
4	54	1	0	1	0	1	0	0	0	0	0	0	0	0	0	0	2	400
1	52	1	0	0	0	1	0	0	0	0	0	0	0	0	0	0	2	401
1	49	1	0	1	0	1	0	0	0	0	0	0	0	0	0	0	2	402
1	58	1	0	1	0	1	0	0	0	0	0	0	0	0	0	0	2	403
1	42	1	0	1	0	1	0	0	0	0	0	0	0	0	0	0	2	404
1	54	1	0	1	0	1	0	0	0	0	0	0	0	0	0	0	2	405
1	52	1	0	1	0	0	0	1	0	0	0	0	0	0	0	0	2	406
1	56	1	0	1	0	0	0	1	0	0	0	0	0	0	0	0	3	407
1	56	1	0	0	0	1	0	0	0	0	0	0	0	0	0	0	3	408
1	58	1	0	1	0	1	0	0	0	0	0	0	0	0	0	0	3	409
1	56	1	0	1	0	1	0	0	0	0	0	0	0	0	0	0	3	410
1	54	1	0	1	0	1	0	0	0	0	0	0	0	0	0	0	3	411
1	56	1	0	1	0	1	0	0	0	0	0	0	0	0	0	0	3	412
1	58	1	0	1	0	1	0	0	0	0	0	0	0	0	0	0	3	413
1	53	1	0	1	0	1	0	0	0	0	0	0	0	0	0	0	3	414
1	38	1	0	1	0	0	0	1	0	0	0	0	0	0	0	0	3	415
1	50	1	1	1	0	1	0	0	0	0	0	0	0	0	0	0	3	416
4	23	1	0	1	0	1	0	0	0	0	0	0	0	0	0	0	3	417
1	36	1	0	1	0	1	0	0	0	0	0	0	0	0	0	0	3	418
1	56	1	0	1	0	1	0	0	0	0	0	0	0	0	0	0	3	419
1	50	1	0	1	0	1	0	0	0	0	0	0	0	0	0	0	3	420
1	51	1	0	1	0	1	0	0	0	0	0	0	0	0	0	0	3	421
1	39	1	0	1	0	0	0	1	0	0	0	0	0	0	0	0	3	422
1	39	1	0	1	0	1	0	0	0	0	0	0	0	0	0	0	3	423
1	28	1	0	0	0	1	0	0	0	0	0	0	0	0	0	0	3	424
1	30	1	0	0	0	1	0	0	0	0	0	0	0	0	0	0	3	425
1	23	1	0	0	0	1	0	0	0	0	0	0	0	0	0	0	3	426
1	41	1	0	1	0	1	0	0	0	0	0	0	0	0	0	0	3	427
4	31	1	0	1	0	1	0	0	0	0	0	0	0	0	0	0	3	428
1	43	1	0	1	0	0	0	1	0	0	0	0	0	0	0	0	3	429
1	68	1	0	1	0	1	0	0	0	0	0	0	0	0	0	0	3	430
4	29	1	0	1	0	1	0	0	0	0	0	0	0	0	0	0	3	431
1	26	1	0	1	0	1	0	0	0	0	0	0	0	0	0	0	3	432
1	52	1	0	1	0	1	0	0	0	0	0	0	0	0	0	0	3	433
1	63	1	0	1	0	1	0	0	0	0	0	0	0	0	0	0	3	434
1	48	1	0	1	0	1	0	0	0	0	0	0	0	0	0	0	3	435
1	56	1	0	0	0	1	0	0	0	0	0	0	0	0	0	0	3	436
1	33	1	0	1	0	1	0	0	0	0	0	0	0	0	0	0	3	437
1	25	1	0	1	0	1	0	0	0	0	0	0	0	0	0	0	3	438
1	36	1	0	1	0	1	0	0	0	0	0	0	0	0	0	0	3	439
1	49	1	0	0	0	1	0	0	0	0	0	0	0	0	0	0	3	440
1	31	1	0	0	0	1	0	0	0	0	0	0	0	0	0	0	3	441
1	50	1	0	1	0	0	0	1	0	0	0	0	0	0	0	0	3	442
1	26	1	0	0	0	1	0	0	0	0	0	0	0	0	0	0	3	443
1	30	1	0	1	0	1	0	0	0	0	0	0	0	0	0	0	3	444
1	39	1	0	1	0	1	0	0	0	0	0	0	0	0	0	0	3	445
1	29	1	0	1	0	1	0	0	0	0	0	0	0	0	0	0	3	446
1	23	1	0	1	0	1	0	0	0	0	0	0	0	0	0	0	3	447
1	30	1	0	0	0	0	0	1	0	0	0	0	0	0	0	0	3	448
1	43	1	0	1	0	1	0	0	0	0	0	0	0	0	0	0	3	449
1	27	1	0	1	0	1	0	0	0	0	0	0	0	0	0	0	3	450
1	52	1	0	1	0	0	0	1	0	0	0	0	0	0	0	0	3	451
1	34	1	0	0	0	1	0	0	0	0	0	0	0	0	0	0	3	452
1	44	1	0	1	0	0	0	1	0	0	0	0	0	0	0	0	3	453
1	49	1	0	1	0	0	0	1	0	0	0	0	0	0	0	0	3	454
1	50	1	0	0	0	1	0	0	0	0	0	0	0	0	0	0	2	455
1	34	1	0	1	0	1	0	0	0	0	0	0	0	0	0	0	2	456
1	47	1	0	0	0	1	0	0	0	0	0	0	0	0	0	0	2	457
1	35	1	0	1	0	1	0	0	0	0	0	0	0	0	0	0	2	458
1	51	1	0	1	0	1	0	0	0	0	0	0	0	0	0	0	2	459
1	46	1	0	1	0	1	0	0	0	0	0	0	0	0	0	0	2	460
1	50	1	0	1	0	1	0	0	0	0	0	0	0	0	0	0	2	461
1	56	1	0	0	0	1	0	0	0	0	0	0	0	0	0	0	2	462
1	51	1	0	0	0	1	0	0	0	0	0	0	0	0	0	0	2	463
1	46	1	0	1	0	1	0	0	0	0	0	0	0	0	0	0	2	464
1	52	1	0	1	0	1	0	0	0	0	0	0	0	0	0	0	2	465
1	49	1	0	1	0	0	0	1	0	0	0	0	0	0	0	0	2	466
1	49	1	0	1	0	1	0	0	0	0	0	0	0	0	0	0	2	467
1	37	1	0	1	0	1	0	0	0	0	0	0	0	0	0	0	2	468
1	52	1	0	0	0	1	0	0	0	0	0	0	0	0	0	0	2	469
1	34	1	0	1	0	1	0	0	0	0	0	0	0	0	0	0	2	470
4	28	1	0	1	0	1	0	0	0	0	0	0	0	0	0	0	2	471
1	33	1	0	0	0	0	0	1	0	0	0	0	0	0	0	0	2	472
1	52	1	0	1	0	1	0	0	0	0	0	0	0	0	0	0	2	473
1	31	1	0	1	0	1	0	0	0	0	0	0	0	0	0	0	2	474
1	34	1	0	1	0	0	0	1	0	0	0	0	0	0	0	0	2	475
1	48	1	0	1	0	1	0	0	0	0	0	0	0	0	0	0	2	476
1	51	1	0	1	0	0	0	1	0	0	0	0	0	0	0	0	2	477
1	31	1	0	1	0	1	0	0	0	0	0	0	0	0	0	0	2	478
1	47	1	0	1	0	0	0	1	0	0	0	0	0	0	0	0	2	479
1	42	1	0	1	0	1	0	0	0	0	0	0	0	0	0	0	2	480
1	39	1	0	0	0	1	0	0	0	0	0	0	0	0	0	0	2	481
1	52	1	0	1	0	1	0	0	0	0	0	0	0	0	0	0	2	482
1	31	1	0	1	0	1	0	0	0	0	0	0	0	0	0	0	2	483
1	40	1	0	1	0	1	0	0	0	0	0	0	0	0	0	0	2	484
1	54	1	0	1	0	1	0	0	0	0	0	0	0	0	0	0	2	485
1	53	1	0	1	0	0	0	1	0	0	0	0	0	0	0	0	2	486
1	46	1	0	1	0	1	0	0	0	0	0	0	0	0	0	0	2	487
1	54	1	0	1	0	1	0	0	0	0	0	0	0	0	0	0	2	488
1	34	1	0	1	0	1	0	0	0	0	0	0	0	0	0	0	2	489
2	46	0	1	1	1	1	0	0	0	1	1	0	0	1	0		1	490
2	78	1	0	1	1	1	0	0	0	1	1	0	1	1	0		1	491
2	55	1	0	0	1	1	0	0	0	0	0	0	1	0	0		1	492
2	36	0	0	1	1	1	0	0	0	1	1	1	1	1	0		1	493
2	61	1	1	1	1	1	0	0	0	1	1	1	1	1	0		2	494
2	70	1	0	0	1	1	0	0	0	1	1	0	0	1	0		1	495
2	75	0	1	1	1	1	0	0	0	1	1	0	0	1	0		1	496
2	54	1	1	1	1	1	0	0	0	1	1	0	0	0	0		3	497
2	55	1	0	1	1	1	0	0	0	1	1	1	0	0	0		3	498
2	42	1	1	1	1	0	1	0	0	1	1	1	0	1	0		2	499
2	74	1	1	1	1	1	0	0	0	0	0	1	1	0	0		1	500
2	70	1	0	0	0	0	0	0	0	1	0	0	0	0	1	1	1	501
2	69	1	0	0	1	0	0	0	1	1	0	0	0	0	1		1	502
5	40	1	0	0	1	0	0	0	0	1	0	0	1	0	0		3	503
1	47	1	0	0	0	0	0	0	0	1	0	0	0	0	1	1	3	504
2	55	1	0	1	1	1	0	0	0	1	0	0	0	1	0		2	505
2	59	1	1	1	1	1	0	0	0	1	1	0	1	0	0		2	506
2	70	1	0	1	0	0	0	0	0	1	0	0	0	0	0	1	1	507
2	70	1	0	1	0	1	0	0	0	0	0	0	0	0	0	1	2	508
2	67	1	1	1	1	0	1	0	0	1	1	0	1	0	0		1	509
2	53	1	0	0	0	0	0	0	0	1	0	0	1	0	0	1	1	510
1	48	1	0	0	0	0	0	0	0	1	0	0	1	0	0	1	2	511
1	40	1	0	1	0	0	0	0	0	1	0	0	1	1	0	1	3	512
1	42	1	0	1	0	0	0	0	0	1	0	0	0	0	0	1	2	513
5	53	1	0	0	1	1	0	0	0	1	1	1	0	1	0		1	514
2	55	1	0	0	1	1	0	0	0	1	0	0	1	0	0		2	515
5	20	1	0	0	0	0	0	0	0	1	1	0	1	0	0	1	3	516
5	37	1	0	0	1	1	0	0	0	1	0	0	0	0	0		2	517
1	27	1	0	1	1	0	1	0	0	0	0	1	1	0	0		2	518
1	22	1	0	0	0	0	0	0	0	1	0	0	0	0	1	1	3	519
2	31	1	0	1	1	1	0	0	0	0	1	0	1	1	0		2	520
5	53	1	0	1	1	0	0	0	1	1	0	1	0	0	0		3	521
4	35	1	0	1	1	1	0	0	0	0	0	0	0	0	0		3	522
2	29	1	0	1	1	0	1	0	0	0	0	0	1	0	0		2	523
2	25	1	0	0	1	0	1	0	0	0	0	0	1	0	0		2	524
2	45	1	0	0	1	0	1	0	0	1	0	0	1	0	0		2	525
2	32	1	0	0	1	1	0	0	0	0	0	0	0	0	1		2	526
2	61	1	0	1	1	1	0	0	0	1	0	0	1	0	0		1	527
1	54	1	0	1	0	1	0	0	0	1	0	0	1	0	0	1	3	528
2	50	1	0	0	0	0	0	0	0	1	0	0	0	0	0	1	2	529
2	54	1	0	0	0	1	0	0	0	1	0	0	1	0	0	1	2	530
5	23	1	0	0	0	0	0	0	0	1	0	0	0	0	1	1	2	531
2	78	1	0	0	0	0	0	0	0	0	0	0	1	0	0	1	1	532
2	36	1	0	0	0	0	0	0	0	1	0	0	0	0	0	1	1	533
5	8	1	0	0	0	1	0	0	0	1	0	0	0	0	0	1	1	534
2	67	1	0	0	0	1	0	0	0	1	0	0	1	0	0	1	1	535
5	78	1	0	0	0	0	0	0	0	1	0	0	1	0	0	1	1	536
5	40	1	0	1	1	1	0	0	0	1	0	0	1	0	0		2	537
5	30	1	0	0	1	1	0	0	0	1	0	0	1	0	0		3	538
2	48	1	0	1	1	1	0	0	0	1	0	0	1	0	0		1	539
2	47	1	0	0	1	0	0	0	0	1	0	0	0	0	0		1	540
2	65	1	0	0	0	0	0	0	0	1	0	0	0	0	0	1	1	541
4	52	1	0	1	1	1	0	0	0	0	0	0	0	0	0		3	542
2	54	1	0	1	1	1	0	0	0	0	0	0	0	0	0		1	543
2	54	1	0	0	0	0	0	0	0	1	1	0	0	1	0	1	1	544
5	45	0	0	1	1	0	1	0	0	1	0	0	0	1	0		1	545
1	35	1	0	1	0	0	0	0	0	1	0	0	1	1	0	1	3	546
1	57	1	0	1	1	0	0	0	0	1	0	0	1	1	0		2	547
2	57	1	0	1	0	0	0	0	0	1	0	0	0	0	0	1	2	548
2	34	1	0	0	0	0	0	0	0	1	0	0	0	0	0	1	2	549
1	28	1	0	1	0	0	0	0	0	1	0	0	0	0	1	1	3	550
5	53	1	0	0	1	0	0	0	0	1	0	0	0	1	0		1	551
5	15	1	0	1	0	0	0	0	0	1	0	0	0	0	1	1	2	552
5	9	1	0	0	1	0	0	0	0	1	0	0	0	0	0		1	553
2	65	1	0	1	1	0	0	0	0	1	0	1	0	0	0		1	554
3	52	1	0	1	0	0	0	0	0	1	0	0	0	0	0	1	1	555
5	18	1	0	0	0	0	0	0	0	1	0	0	0	1	0	1	3	556
5	43	1	0	0	0	0	0	0	0	1	0	0	0	0	1	1	1	557
5	22	1	0	0	0	0	0	0	0	1	0	0	0	0	0	1	3	558
2	70	1	0	1	0	0	0	0	0	0	0	0	0	0	1	1	1	559
5	62	1	0	0	0	0	0	0	0	1	0	0	0	1	0	1	2	560
5	16	1	0	1	0	0	0	0	0	1	0	0	0	0	0	1	3	561
2	35	1	0	1	0	0	0	0	0	1	0	0	1	0	0	1	2	562
2	89	1	0	0	0	0	0	0	0	1	0	0	1	0	0	1	1	563
5	57	1	0	1	1	0	1	0	0	1	0	0	1	0	0		2	564
2	50	1	0	1	0	0	0	0	0	1	0	0	0	0	0	1	2	565
2	28	1	0	1	1	1	0	0	0	1	0	0	0	1	0		2	566
5	30	1	0	0	0	0	0	0	0	1	0	0	0	0	0	1	2	567
2	57	1	0	1	1	1	0	0	0	1	0	0	0	1	0		2	568
2	58	1	0	0	0	0	0	0	0	1	0	0	0	0	0	1	2	569
1	42	1	0	1	0	0	0	0	0	1	0	0	0	0	0	1	3	570
2	35	1	0	1	1	1	0	0	0	1	1	0	0	1	1		2	571
2	36	1	0	0	1	1	0	0	0	0	0	0	1	1	1		2	572
1	33	1	0	0	1	0	0	0	0	1	0	0	0	0	0		2	573
2	38	1	0	1	0	1	0	0	0	1	0	0	0	0	0	1	2	574
2	40	1	0	1	0	1	0	0	0	1	0	0	1	0	0	1	2	575
2	76	1	0	1	1	1	0	0	0	1	1	0	0	1	0		1	576
2	24	1	0	1	0	1	0	0	0	0	0	0	0	0	0	1	2	577
2	53	1	0	0	1	0	0	0	0	1	0	0	0	0	0		1	578
1	20	1	0	0	0	0	0	0	0	1	0	0	0	0	1	1	3	579
2	67	1	0	1	1	0	0	0	0	0	1	0	0	1	1		1	580
2	29	1	0	1	0	0	0	0	0	1	0	0	0	1	1	1	2	581
2	56	1	0	0	1	1	1	0	0	1	0	0	1	0	0		1	582
5	15	1	0	0	0	0	0	0	0	1	0	0	1	0	1	1	3	583
5	52	1	0	0	0	0	0	0	0	1	1	0	0	1	0	1	1	584
1	44	1	0	1	0	0	0	0	0	1	0	0	0	0	1	1	3	585
1	32	1	0	1	1	0	0	0	0	1	1	0	0	0	0		2	586
5	70	1	0	1	0	1	0	0	0	1	0	0	0	0	1	1	1	587
1	37	1	0	1	0	0	0	0	1	1	0	0	0	0	0	1	2	588
2	47	1	0	1	1	1	1	0	0	1	1	0	0	0	0		1	589
2	57	1	0	1	1	1	1	0	0	0	0	0	1	0	0		1	590
1	30	1	0	1	1	1	0	0	0	1	0	0	1	0	0		2	591
2	73	1	0	1	0	0	0	0	0	1	1	0	0	0	0	1	2	592
1	50	1	0	1	0	1	0	0	0	1	0	0	0	0	0	1	2	593
5	40	1	0	1	0	0	0	0	0	1	0	0	0	0	0	1	2	594
5	70	1	0	1	0	0	0	0	0	1	0	0	0	0	0	1	2	595
2	51	1	0	1	1	1	0	0	0	0	0	0	1	0	0		2	596
2	25	1	0	1	1	1	0	0	0	0	0	0	0	0	0		2	597
1	27	1	0	1	1	0	0	1	0	1	1	0	0	0	0		2	598
5	34	1	0	1	1	0	1	0	0	1	0	0	0	0	1		2	599
2	58	1	0	1	0	0	0	0	0	1	0	0	0	0	1	1	2	600
5	36	1	0	1	1	0	0	0	0	1	0	0	0	0	1		3	601
2	34	1	0	1	1	0	0	0	0	1	0	0	0	1	0		2	602
2	36	1	1	1	1	1	0	0	0	1	1	0	0	1	0		2	603
2	53	1	0	0	1	1	0	0	0	0	0	1	1	1	0		1	604
2	3	1	0	0	1	0	0	0	0	1	1	1	0	1	0		1	605
2	61	1	0	1	1	1	0	0	0	0	0	1	1	0	0		1	606
2	76	1	0	1	1	1	0	0	0	1	0	0	0	1	0		1	607
2	31	1	1	1	1	0	0	0	0	1	1	1	1	0	0		1	608
2	44	1	0	0	1	1	0	0	0	1	1	1	0	0	0		2	609
2	46	1	0	1	1	1	0	0	0	0	0	1	1	1	0		3	610
1	30	1	0	1	1	0	0	0	0	1	1	1	1	1	0		2	611
1	39	0	0	0	1	0	0	0	1	1	1	1	0	1	0		1	612
1	50	1	1	1	1	0	1	0	0	1	1	1	0	0	0		3	613
2	61	1	0	1	1	0	0	0	0	0	0	0	1	1	0		1	614
2	68	1	1	1	1	1	0	0	0	1	1	0	0	0	0		1	615
3	55	1	0	1	1	1	0	1	0	1	0	0	1	1	0		1	616
2	41	1	1	0	1	0	0	0	0	1	0	0	1	0	0		1	617
5	45	1	1	1	1	0	1	0	0	1	0	0	1	1	0		1	618
2	61	1	0	1	1	0	0	0	0	1	1	1	1	0	0		3	619
2	55	1	1	1	1	1	0	0	0	1	1	0	1	0	0		2	620
2	52	1	0	0	1	1	0	0	0	0	0	0	0	0	0		2	621
2	53	1	1	1	1	0	1	1	0	1	1	1	1	0	0		2	622
5	22	1	0	1	1	0	0	0	0	1	1	0	1	0	0		3	623
5	37	1	0	0	1	0	0	0	0	1	0	0	0	0	0		2	624
1	52	1	0	1	1	0	0	0	0	0	0	1	1	1	0		1	625
2	50	1	1	1	1	0	0	1	0	1	0	1	0	0	0		2	626
2	43	1	1	0	1	0	0	0	0	1	0	0	1	0	0		2	627
2	30	1	0	0	1	0	0	0	0	1	1	0	0	0	0		2	628
2	56	1	1	1	1	0	1	0	0	1	0	1	0	0	0		1	629
2	36	1	0	1	1	0	0	1	0	0	0	1	1	0	0		2	630
2	37	1	0	0	1	0	1	0	0	1	0	0	0	0	0		2	631
2	33	1	0	1	1	0	0	1	0	1	0	0	0	1	0		2	632
2	25	1	0	1	1	0	1	0	0	1	0	0	1	0	0		2	633
2	28	1	1	1	1	0	1	0	0	1	0	0	0	0	0		2	634
2	31	1	0	0	1	0	0	1	0	0	0	0	1	0	0		2	635
2	29	1	1	1	1	0	0	1	0	1	0	0	0	0	0		2	636
2	51	1	0	1	1	0	0	1	0	0	0	0	0	0	0		2	637
2	41	1	0	1	1	0	0	0	0	1	1	1	0	1	0		2	638
2	37	1	0	1	1	0	0	1	0	0	0	0	0	1	0		2	639
2	35	1	1	1	1	0	0	1	0	1	0	1	0	1	0		2	640
2	65	1	0	1	1	0	1	0	0	0	0	0	0	1	0		1	641
2	32	1	0	1	1	0	0	1	0	0	0	0	1	1	0		2	642
2	29	1	0	1	1	0	0	1	0	0	0	1	1	0	0		2	643
2	55	1	1	1	1	0	1	0	0	1	1	0	0	0	0		2	644
2	69	1	0	1	1	1	0	0	0	1	1	0	0	0	0		2	645
2	58	1	1	1	1	0	0	1	0	1	0	0	0	1	0		2	646
2	32	1	0	1	1	0	0	1	0	0	0	0	1	0	0		2	647
2	31	1	0	1	1	0	1	0	0	0	0	0	0	1	0		2	648
2	33	1	0	1	1	0	1	0	0	0	0	0	0	1	0		2	649
2	36	1	0	0	1	1	0	0	0	0	1	0	1	0	0		2	650
2	45	1	0	1	1	1	0	0	0	0	0	0	1	1	0		2	651
2	48	1	0	1	1	0	0	1	0	0	0	0	1	0	0		2	652
2	41	1	0	1	1	0	0	1	0	0	0	0	1	1	0		2	653
2	48	1	0	1	1	0	0	1	0	0	0	0	1	1	0		2	654
2	49	1	0	1	1	0	0	1	0	0	0	0	1	1	0		2	655
2	51	1	0	0	1	0	0	0	0	0	0	0	1	1	0		2	656
5	54	1	0	1	0	0	0	0	0	1	1	1	1	1	1	1	3	657
2	57	1	1	0	1	0	1	0	0	0	1	1	0	0	0		1	658
5	66	1	0	1	1	0	0	0	0	0	1	1	0	0	0		1	659
5	18	0	1	1	1	0	0	0	0	1	1	0	0	0	0		3	660
2	48	1	1	1	1	1	0	0	0	0	1	1	0	0	0		1	661
2	50	1	0	0	1	0	1	0	0	1	1	1	0	0	0		1	662
2	48	1	1	1	1	0	1	0	0	1	1	1	1	0	0		2	663
2	65	1	0	1	1	0	1	0	0	0	1	1	1	0	0		1	664
2	56	1	0	0	1	0	0	0	0	0	0	0	0	0	0		2	665
2	42	1	0	0	1	0	1	0	0	0	1	1	1	0	0		1	666
2	46	1	0	1	1	0	1	0	0	1	1	0	0	0	0		2	667
2	46	1	1	0	1	0	1	0	0	1	0	1	0	0	0		1	668
2	40	0	0	1	1	0	1	0	0	1	1	0	1	0	0		1	669
2	47	1	1	1	1	0	1	0	0	1	1	1	1	0	0		1	670
2	47	1	1	0	1	0	1	0	0	0	1	1	0	0	0		1	671
2	29	1	0	1	1	0	1	0	0	1	0	1	0	0	0		2	672
2	61	1	0	1	1	1	0	0	0	1	0	1	1	0	0		1	673
2	58	1	1	0	1	1	0	0	0	1	1	0	0	0	0		1	674
2	53	1	1	0	1	1	0	0	0	1	0	1	0	0	0		2	675
2	47	1	1	1	1	0	1	0	0	1	0	1	1	0	0		1	676
2	70	1	0	0	1	0	0	0	0	1	1	0	0	0	0		3	677
5	64	1	1	1	1	0	0	0	0	1	1	1	0	0	0		2	678
2	50	1	0	0	1	0	0	0	0	1	0	0	0	0	0		1	679
2	40	1	1	1	1	0	1	0	0	1	0	1	0	0	0		3	680
2	40	1	0	0	1	0	1	0	0	1	1	1	0	0	0		2	681
2	50	1	0	1	1	1	0	0	0	1	0	0	0	0	0		2	682
2	51	0	1	1	1	0	1	0	0	1	1	1	1	1	0		2	683
2	54	1	0	1	1	0	1	0	0	1	1	1	1	1	0		1	684
2	66	1	0	0	1	1	0	0	0	1	1	1	1	1	0		1	685
3	38	1	0	1	0	0	0	0	1	1	1	1	1	1	0	1	2	686
2	62	1	1	1	1	1	0	0	0	1	1	1	1	1	0		2	687
2	62	1	0	0	1	1	0	0	0	0	0	0	0	0	0		2	688
2	73	1	1	1	1	1	0	0	0	1	1	1	1	1	0		1	689
2	46	1	0	1	1	1	0	0	0	0	0	0	1	1	0		2	690
2	71	1	0	0	1	1	0	0	0	1	0	0	1	0	0		1	691
1	56	1	0	0	0	0	0	0	0	1	1	0	1	0	0	1	2	692
1	51	1	0	1	0	0	0	0	0	1	0	0	0	0	0	1	2	693
2	60	1	0	0	0	0	0	0	0	1	0	0	0	0	0	1	2	694
2	65	1	0	1	1	0	0	0	0	1	0	0	0	0	0		2	695
2	44	1	0	1	1	1	0	0	0	0	0	0	0	1	0		1	696
2	50	1	0	0	1	1	0	0	0	0	0	0	0	1	0		1	697
5	23	1	0	1	0	0	0	0	0	1	0	0	0	0	0	1	3	698
5	17	1	0	1	1	0	0	0	0	1	1	0	0	0	0		2	699
2	67	1	0	1	1	0	0	0	0	0	0	0	1	1	0		1	700
2	69	1	0	1	1	1	0	0	0	1	0	0	1	0	0		1	701
2	56	1	0	1	0	1	0	0	0	1	0	0	0	0	0	1	1	702
2	77	0	0	1	1	1	0	0	0	1	0	0	0	0	0		1	703
2	62	1	0	1	0	0	0	0	0	1	0	0	0	0	0	1	1	704
1	33	1	0	1	0	0	0	0	0	1	0	0	0	0	0	1	3	705
5	62	1	0	1	0	0	0	0	1	0	0	0	1	0	0	1	2	706
1	58	1	0	1	0	0	0	0	0	1	0	0	0	0	1	1	2	707
2	54	1	0	1	1	0	0	1	0	1	1	0	0	0	0		1	708
5	55	1	0	0	1	1	1	0	1	1	1	0	0	0	1		2	709
5	57	1	0	1	1	0	1	0	0	1	0	0	0	0	0		1	710
2	72	1	0	1	1	1	0	0	0	0	0	1	1	0	0		1	711
2	71	1	0	0	1	1	0	0	0	0	0	1	1	0	1		1	712
2	49	1	0	1	1	0	1	0	0	1	0	1	1	0	0		2	713
2	57	1	0	1	1	0	0	0	1	1	0	0	1	1	1		1	714
2	56	1	0	1	1	1	0	0	0	1	0	0	1	0	0		1	715
2	55	1	0	0	1	1	0	0	0	0	0	0	1	0	0		1	716
2	56	1	0	1	0	1	0	0	0	1	0	0	0	0	0	1	1	717
5	51	1	0	1	1	0	1	0	0	0	0	0	0	1	0		1	718
2	45	1	0	1	1	1	0	0	0	1	1	0	0	0	0		1	719
3	39	1	0	1	1	0	0	0	1	1	0	0	1	0	0		2	720
2	52	1	0	1	1	1	0	0	0	1	0	0	1	1	0		1	721
5	57	1	0	0	0	1	0	0	0	1	0	0	0	0	0	1	1	722
2	60	1	0	1	0	0	0	0	0	0	0	0	1	0	0	1	2	723
5	35	1	0	1	0	0	0	0	0	0	0	0	0	0	0	1	1	724
1	48	1	0	1	0	0	0	0	0	1	0	0	0	0	0	1	1	725
2	85	1	0	1	0	0	0	0	0	1	0	0	0	0	0	1	2	726
2	28	1	0	1	1	0	0	0	0	1	0	0	0	1	0		3	727
2	48	1	0	1	1	1	0	0	0	0	1	0	1	1	0		1	728
2	38	1	0	1	1	1	0	0	0	1	0	0	1	1	0		3	729
3	35	1	0	1	1	0	0	0	0	0	0	0	0	0	0		3	730
1	30	1	0	1	1	0	0	0	0	1	0	0	0	0	0		2	731
2	47	1	0	1	1	1	0	0	0	1	0	0	0	0	0		3	732
2	66	1	0	1	1	0	0	0	0	0	0	0	1	1	0		1	733
5	77	0	0	1	1	0	1	0	0	1	1	0	0	0	0		2	734
5	49	1	0	0	1	0	0	0	0	1	0	0	0	0	0		2	735
5	16	1	0	1	1	0	0	0	0	1	0	0	0	0	0		3	736
2	63	1	0	0	1	0	0	0	0	1	0	0	1	0	0		2	737
2	70	1	0	1	1	1	0	0	0	1	0	0	0	0	0		2	738
2	68	1	0	1	1	1	0	0	0	1	0	0	0	0	0		2	739
3	53	1	0	1	1	0	0	0	1	1	0	0	0	0	0		2	740
5	45	1	0	1	1	0	1	0	0	0	0	0	1	0	0		2	741
2	38	1	0	0	1	1	1	0	0	0	0	0	1	1	0		2	742
2	30	1	0	1	1	1	0	0	0	0	0	0	1	1	0		2	743
5	29	1	0	1	0	0	0	0	0	1	1	0	0	0	0	1	3	744
2	66	1	0	1	1	1	0	0	0	0	0	1	0	0	0		1	745
5	51	1	0	1	0	0	0	0	0	0	0	1	1	1	0	1	1	746
2	46	1	0	1	0	1	0	0	0	1	1	0	1	0	0	1	1	747
1	35	1	0	1	0	0	0	0	0	1	0	0	0	0	0	1	2	748
5	51	1	0	1	1	0	1	0	0	1	0	0	0	0	0		2	749
3	25	0	0	1	0	0	0	0	0	1	0	0	0	0	0	1	2	750
2	73	1	0	1	1	1	0	0	0	0	0	1	0	0	0		1	751
2	54	1	0	1	1	1	0	0	0	0	0	1	0	0	0		1	752
5	79	1	0	0	0	0	0	0	0	1	0	0	1	0	0	1	2	753
5	76	1	0	0	0	0	0	0	0	1	0	0	1	0	0	1	2	754
1	28	1	0	1	0	0	0	0	0	1	0	0	0	0	1	1	1	755
1	30	1	0	1	1	0	0	0	0	1	0	0	1	0	0		2	756
1	61	1	0	1	1	0	0	0	0	1	0	0	0	0	0		3	757
2	47	0	0	1	0	0	0	0	0	1	0	0	0	0	0	1	2	758
2	50	1	0	1	1	1	0	0	0	0	0	0	0	1	0		1	759
2	46	1	0	0	1	1	0	0	0	0	0	1	1	1	0		1	760
2	51	1	0	0	1	1	0	0	0	1	0	0	1	0	0		1	761
2	43	1	0	0	0	0	0	0	0	1	0	0	1	0	0	1	2	762
2	53	1	0	1	1	1	0	0	0	1	0	0	0	1	0		1	763
2	55	1	0	0	1	1	0	0	0	0	0	0	0	0	0		1	764
2	33	1	0	0	1	1	0	0	0	1	1	0	1	1	0		2	765
5	11	1	0	1	1	0	0	0	0	1	0	0	0	0	0		1	766
2	38	1	0	0	1	0	0	0	0	1	1	0	0	0	1		1	767
2	50	1	0	0	0	0	0	0	0	1	0	1	0	0	0	1	1	768
5	45	1	0	1	0	0	1	0	0	1	1	0	0	0	0	1	1	769
5	44	1	0	0	1	0	1	0	0	0	0	0	1	0	0		1	770
5	64	1	0	1	0	0	0	0	0	1	0	0	0	1	0	1	2	771
1	56	1	0	1	1	0	0	0	1	0	0	0	1	0	0		1	772
5	35	1	0	0	1	0	1	0	0	1	0	0	0	1	0		3	773
5	67	1	0	1	0	0	0	0	0	1	0	0	0	0	0	1	2	774
2	51	1	0	0	0	1	0	0	0	1	0	0	1	0	0	1	1	775
5	12	1	0	1	1	0	0	0	0	1	0	0	0	0	0		1	776
2	57	1	0	1	1	1	0	0	0	0	0	0	1	0	0		1	777
2	55	1	0	0	0	0	0	0	0	1	0	0	0	0	0	1	1	778
4	53	1	0	1	1	1	0	0	0	1	0	0	0	0	0		2	779
1	39	0	0	0	1	0	0	0	1	1	1	1	0	0	0		2	780
2	56	1	0	0	1	1	0	0	0	1	1	0	0	0	0		1	781
2	79	1	0	1	1	1	0	0	0	1	0	0	1	0	0		1	782
5	24	1	0	1	1	0	1	0	0	1	0	0	1	0	0		2	783
2	58	1	0	0	1	1	0	0	0	1	0	1	1	0	0		1	784
3	55	1	0	1	1	0	0	0	1	1	0	0	0	1	0		1	785
2	70	1	0	1	1	1	0	0	0	1	1	0	0	0	0		2	786
2	35	1	0	1	1	1	0	0	0	0	0	0	1	0	0		3	787
1	21	1	0	1	1	0	0	1	0	0	0	0	1	0	0		2	788
1	36	1	0	1	1	1	0	0	0	1	0	0	0	0	0		3	789
1	42	1	0	1	1	1	0	0	0	0	0	0	0	0	0		3	790
4	23	1	0	1	1	1	0	0	0	0	0	0	0	0	0		3	791
1	23	1	0	0	1	1	0	0	0	0	0	0	0	0	0		3	792
1	25	1	0	1	1	1	0	0	0	0	0	0	0	0	0		3	793
1	26	1	0	1	1	1	0	0	0	0	0	0	0	0	0		3	794
1	37	1	0	1	1	1	0	0	0	0	0	0	0	0	0		3	795
1	42	1	0	0	1	0	0	1	0	0	0	0	0	0	0		3	796
1	36	1	0	1	1	1	0	0	0	0	0	0	1	0	0		3	797
1	32	1	0	1	1	0	0	0	0	0	0	0	0	0	0		2	798
1	30	1	0	0	1	0	0	0	0	0	0	0	0	0	0		2	799
4	32	1	1	1	1	1	0	0	0	0	0	1	0	0	0		2	800
1	30	1	0	1	1	1	0	0	0	0	0	0	0	0	0		2	801
1	29	1	0	1	1	1	0	0	0	0	0	0	0	0	0		3	802
1	33	1	0	1	1	0	0	1	0	0	0	1	0	0	0		3	803
4	31	1	0	1	1	1	0	0	0	0	0	0	1	1	0		2	804
1	34	1	0	1	1	0	0	1	0	0	0	0	0	0	0		2	805
4	29	1	0	1	1	1	0	0	0	0	0	0	0	0	0		3	806
1	44	1	0	1	1	1	0	0	0	0	0	0	0	0	0		2	807
1	44	1	0	0	1	1	0	0	0	0	0	0	0	0	0		2	808
2	52	1	0	0	1	0	0	0	1	1	1	1	1	1	0		1	809
1	33	1	0	1	1	1	0	0	0	0	0	0	0	0	0		2	810
1	29	1	0	1	1	1	0	0	0	0	0	0	0	0	0		2	811
5	23	1	1	1	1	0	1	0	0	1	1	0	0	0	0		3	812
2	61	1	0	1	1	0	0	0	0	1	0	0	0	0	0		3	813
5	58	1	1	1	1	0	1	0	0	1	1	1	1	0	0		2	814
2	54	1	1	0	1	1	0	0	0	1	1	0	0	0	0		1	815
1	60	1	1	0	1	0	0	0	1	1	1	0	1	1	0		1	816
1	44	1	1	0	1	0	0	0	1	0	0	0	1	1	0		1	817
1	42	1	0	0	1	0	1	0	0	0	0	0	1	0	0		1	818
1	46	1	1	0	1	0	0	0	1	1	1	1	0	0	0		3	819
2	26	1	0	0	1	1	0	0	0	1	1	1	1	1	0		1	820
2	53	1	1	1	1	0	0	0	0	1	1	0	1	1	0		2	821
2	65	1	0	1	1	1	0	0	0	1	0	1	0	0	0		1	822
5	51	1	0	0	1	0	0	0	0	0	0	0	0	0	0		3	823
2	73	1	1	0	1	1	0	0	0	1	0	0	0	0	0		1	824
2	51	1	0	0	1	1	0	0	0	1	0	0	0	0	0		1	825
2	48	1	0	1	1	1	0	0	0	0	1	0	1	1	0		2	826
2	48	1	0	1	1	1	0	0	0	1	1	0	1	1	0		2	827
2	42	1	0	0	1	1	0	0	0	0	1	0	1	1	0		2	828
2	41	1	0	1	1	1	0	0	0	0	0	0	0	1	0		2	829
5	6	1	0	0	1	0	0	0	0	1	1	0	0	0	0		2	830
4	58	1	1	1	1	1	0	0	0	1	1	0	1	0	0		3	831
2	61	1	1	0	1	1	0	0	0	0	1	0	0	1	0		1	832
5	13	1	0	1	1	0	0	0	0	1	0	0	0	0	0		2	833
2	19	1	0	0	1	1	0	0	0	1	0	0	0	0	0		2	834
3	31	1	1	1	1	0	0	1	0	1	1	0	1	0	0		2	835
5	3	1	0	0	1	0	0	0	0	1	0	0	0	0	0		1	836
3	59	1	0	1	1	0	0	1	0	0	0	0	1	0	0		1	837
2	55	1	0	0	1	1	0	0	0	1	0	0	0	0	0		1	838
3	22	1	0	1	1	0	0	1	0	0	1	0	0	1	0		2	839
1	61	1	1	1	1	1	0	0	0	1	0	0	0	1	0		1	840
5	73	1	0	0	1	0	0	0	0	1	0	0	0	0	0		1	841
3	30	1	1	1	1	0	0	1	0	1	0	0	1	0	0		2	842
1	52	1	0	1	1	0	0	0	0	0	0	0	1	0	0		1	843
3	41	1	1	1	1	0	0	1	0	0	0	0	1	0	0		2	844
5	52	1	0	1	1	0	1	0	0	0	0	0	1	0	0		1	845
5	64	1	0	1	1	0	0	0	0	0	0	0	1	0	0		1	846
5	37	1	0	0	1	0	0	0	0	0	0	0	1	0	0		3	847
2	41	1	0	1	1	1	0	0	0	0	0	0	0	1	0		2	848
2	41	1	0	0	1	1	0	0	0	0	0	0	0	1	0		2	849
1	47	1	0	0	1	0	0	0	0	1	0	0	0	0	0		2	850
1	28	1	0	1	1	0	0	0	0	0	1	0	0	1	0		2	851
3	54	1	1	0	1	0	0	1	0	1	0	0	0	0	0		1	852
3	47	1	0	1	1	0	0	1	0	0	0	0	1	0	0		2	853
2	50	1	0	0	1	1	0	0	0	1	0	0	0	0	0		2	854
3	44	1	0	1	1	0	0	1	0	0	0	0	0	0	1		2	855
5	56	1	1	0	1	0	1	0	0	0	0	0	1	0	0		1	856
2	33	1	1	1	1	1	0	0	0	1	0	0	0	0	0		2	857
2	61	1	0	1	1	1	0	0	0	0	0	0	0	1	0		1	858
2	54	1	0	0	1	1	0	0	0	0	0	0	0	1	0		1	859
2	59	1	1	1	1	1	0	0	0	0	0	1	0	0	0		1	860
2	38	1	0	0	1	1	0	0	0	0	0	0	0	1	0		2	861
5	34	1	0	1	1	0	1	0	0	0	0	0	0	1	0		2	862
5	33	1	0	0	1	0	1	0	0	0	0	0	0	1	0		2	863
2	50	1	1	1	1	0	1	0	0	1	1	1	0	1	0		2	864
3	42	1	0	1	1	0	0	0	0	0	0	0	0	0	0		2	865
2	25	1	0	1	1	0	1	0	0	0	0	0	0	0	0		2	866
2	34	1	0	1	1	0	0	0	0	0	0	0	0	0	0		2	867
2	43	1	1	1	1	0	0	0	0	0	0	1	0	0	0		2	868
2	46	1	0	0	1	0	0	0	0	0	0	0	0	0	0		2	869
2	36	1	0	1	1	0	0	0	0	0	0	0	0	0	0		2	870
2	46	1	1	1	1	0	1	0	0	1	1	1	0	0	0		2	871
2	42	1	1	0	1	0	0	0	0	1	1	1	0	0	0		2	872
5	18	0	1	1	1	0	0	0	0	0	0	1	0	0	0		3	873
2	49	1	0	1	1	0	1	0	0	0	0	0	0	0	0		1	874
2	42	1	1	0	1	0	0	0	0	0	0	1	0	0	0		2	875
2	50	0	0	1	1	0	1	0	0	0	0	0	0	0	0		2	876
2	49	1	1	1	1	0	0	0	0	1	0	1	0	0	0		2	877
2	46	1	0	0	1	0	1	0	0	0	0	1	0	0	0		2	878
2	33	1	0	1	1	0	1	0	0	0	0	0	0	0	0		3	879
2	24	1	1	1	1	0	1	0	0	0	1	1	0	0	0		2	880
2	46	1	0	1	1	0	1	0	0	0	0	0	0	0	0		2	881
2	52	1	0	0	1	1	0	0	0	0	0	0	1	0	0		2	882
2	53	1	0	1	1	1	0	0	0	0	0	0	0	0	0		2	883
2	55	0	0	0	1	0	1	0	0	0	0	0	1	0	0		2	884
2	51	1	0	0	1	0	1	0	0	0	0	0	1	0	0		2	885
2	68	1	0	1	1	1	0	0	0	1	1	1	1	1	0		1	886
2	66	1	0	1	1	1	0	0	0	0	0	0	1	0	0		1	887
2	85	1	0	0	1	1	0	0	0	1	1	1	1	1	0		2	888
2	63	1	1	1	0	1	0	0	0	1	1	1	1	1	0	1	2	889
1	30	1	0	1	1	0	1	0	0	1	1	1	1	1	0		2	890
2	76	1	0	1	1	1	0	0	0	0	0	0	1	0	0		2	891
2	60	1	1	1	1	1	0	0	0	1	1	1	0	1	0		2	892
2	75	1	0	0	1	1	0	0	0	0	0	0	1	1	0		2	893
2	77	1	0	1	1	1	0	0	0	1	1	1	1	1	0		2	894
2	49	1	1	0	1	1	0	0	0	1	1	0	0	1	0		2	895
2	50	1	0	1	1	1	0	0	0	0	0	0	0	1	0		2	896
2	70	1	0	0	1	0	0	0	0	1	1	0	0	1	0		2	897
2	40	1	1	0	1	1	0	0	0	1	1	1	1	1	0		2	898
5	11	1	1	0	1	0	0	0	0	1	1	1	1	1	0		1	899
2	74	1	0	1	1	1	0	0	0	0	0	0	0	0	1		2	900
2	72	1	0	0	1	1	0	0	0	0	0	0	0	0	0		1	901
5	10	1	0	1	1	0	0	0	0	0	0	0	0	0	0		1	902
2	49	1	0	1	1	0	1	0	0	0	0	0	1	0	0		2	903
5	62	1	1	1	1	0	0	0	0	1	1	0	0	0	0		3	904
2	70	1	0	1	1	1	0	0	0	1	1	1	1	0	0		1	905
2	75	1	0	0	1	1	0	0	0	0	0	1	0	0	0		2	906
2	50	1	0	1	1	0	0	0	0	0	0	1	0	0	0		2	907
2	45	1	0	1	1	1	1	0	0	0	1	1	0	0	0		2	908
2	50	1	1	1	1	1	0	0	0	0	0	1	0	0	0		2	909
1	33	1	0	1	1	1	0	0	0	1	0	0	1	0	0		2	910
1	41	1	0	1	1	1	0	0	0	0	0	0	0	0	0		3	911
1	43	1	0	1	1	1	0	0	0	0	0	1	0	1	0		1	912
1	36	1	0	1	1	0	0	1	0	0	0	0	0	0	0		2	913
1	49	1	0	0	1	1	0	0	0	0	0	0	0	0	0		3	914
1	47	1	0	1	1	1	0	0	0	0	0	0	0	0	0		2	915
1	48	1	0	0	1	1	0	0	0	1	1	0	1	0	0		2	916
1	48	1	0	1	1	1	0	0	0	0	0	0	0	0	0		3	917
1	52	1	0	1	1	1	0	0	0	0	0	0	0	0	0		3	918
1	34	1	0	1	1	1	0	0	0	0	0	0	1	1	0		3	919
4	58	1	0	1	1	1	0	0	0	0	0	0	0	0	0		2	920
1	37	1	0	0	1	1	0	0	0	0	1	0	1	0	0		3	921
1	39	1	1	1	1	1	0	0	0	0	0	1	1	1	0		3	922
1	31	1	0	1	1	1	0	0	0	0	1	1	1	1	0		3	923
1	31	1	0	1	1	1	0	0	0	0	0	0	0	0	0		2	924
1	36	1	0	0	1	1	0	0	0	0	0	0	0	0	0		2	925
1	37	1	0	0	1	1	0	0	0	0	0	0	0	0	0		2	926
1	25	1	0	1	1	0	0	1	0	0	0	0	0	0	0		3	927
1	47	1	0	1	1	1	0	0	1	0	0	0	0	0	0		3	928
1	47	1	0	0	1	1	0	0	0	0	0	0	0	0	0		1	929
1	46	1	0	0	1	1	0	0	0	0	0	0	0	0	0		2	930
1	30	1	0	0	1	1	0	0	0	0	0	0	0	0	0		3	931
4	27	1	0	1	1	1	0	0	0	0	0	0	0	0	0		3	932
1	23	1	0	1	1	1	0	0	0	0	0	0	0	0	0		3	933
1	27	1	0	1	1	1	0	0	0	0	0	0	0	0	0		3	934
1	46	1	0	0	1	1	0	0	0	0	0	0	1	1	0		1	935
1	48	1	0	1	1	1	0	0	0	0	0	0	0	0	0		3	936
1	56	1	1	1	1	1	0	0	0	0	1	0	1	1	0		3	937
2	52	1	0	0	0	0	0	0	0	1	1	0	1	1	0	1	2	938
5	70	1	0	0	0	0	0	0	0	1	1	1	0	0	0	1	2	939
5	80	1	0	0	0	0	0	0	0	1	1	0	0	1	0	1	1	940
2	26	1	0	1	1	0	0	0	0	1	0	1	0	0	0		2	941
2	76	1	0	1	1	1	0	0	0	0	0	0	1	0	0		2	942
5	21	1	0	1	1	0	1	0	0	0	1	0	0	1	1		3	943
5	45	1	0	1	1	0	1	0	0	0	0	1	1	0	0		2	944
2	61	1	0	1	1	1	0	0	0	0	0	0	0	0	1		1	945
2	72	1	0	1	1	1	0	0	0	1	0	0	0	0	0		1	946
2	34	1	0	1	1	1	0	0	0	0	0	0	0	0	0		3	947
1	54	1	0	1	0	0	0	0	0	1	1	1	0	1	0	1	2	948
2	67	1	0	1	0	0	0	0	0	1	0	0	0	0	0	1	1	949
2	73	1	0	1	0	0	0	0	0	0	0	0	1	0	0	1	1	950
2	69	1	0	1	1	0	0	0	0	1	0	0	1	0	0		1	951
2	71	1	0	0	1	1	0	0	0	1	0	0	0	0	0		1	952
5	44	1	0	1	1	0	1	0	0	1	0	1	0	1	0		2	953
2	45	1	0	1	1	1	1	0	0	0	0	0	1	0	0		2	954
2	53	1	0	1	1	1	0	0	0	0	1	0	0	1	0		2	955
5	37	1	0	1	1	0	0	0	0	0	0	0	1	0	0		2	956
5	39	1	0	1	1	0	0	0	0	0	0	0	1	0	0		2	957
2	56	1	0	0	1	0	0	0	0	1	0	0	0	1	0		2	958
2	55	1	0	0	1	0	1	0	0	1	0	0	0	0	1		2	959
2	64	1	0	1	1	0	1	0	0	1	0	0	0	0	1		2	960
5	52	1	0	1	1	0	1	0	0	1	0	0	0	1	0		2	961
5	10	1	0	1	1	0	0	0	0	1	0	0	0	0	0		2	962
2	54	1	0	0	1	0	0	0	0	0	0	0	1	0	0		2	963
2	54	1	0	1	1	0	0	0	0	0	0	0	1	0	0		2	964
2	71	1	0	0	1	1	0	0	0	0	0	0	1	0	0		1	965
2	50	1	0	1	1	1	0	0	0	1	0	0	0	0	1		2	966
2	68	1	0	1	1	1	0	0	0	1	0	0	0	1	0		2	967
1	44	1	0	0	1	0	0	0	0	1	0	0	0	0	0		2	968
2	63	1	0	0	0	0	0	0	0	1	0	0	0	0	0	1	1	969
5	26	1	0	0	0	0	0	0	0	1	0	0	0	0	0	1	2	970
1	52	1	0	1	1	0	0	0	0	1	0	0	0	0	0		2	971
5	53	1	0	1	1	0	1	0	0	1	0	0	0	1	0		2	972
1	38	1	0	1	1	0	0	0	0	0	0	0	1	0	0		3	973
5	40	1	0	1	1	0	0	0	0	1	0	0	0	0	0		2	974
5	18	1	0	1	1	1	0	0	0	0	0	0	0	0	0		2	975
5	27	1	0	1	1	1	0	0	0	0	0	0	0	0	0		2	976
5	25	1	0	0	1	1	0	0	0	0	0	0	0	0	0		2	977
2	60	1	0	0	0	0	0	0	0	1	1	1	1	0	1	1	1	978
2	53	1	0	0	0	0	0	0	0	1	0	0	0	0	0	1	1	979
2	46	1	0	0	1	0	1	0	0	1	0	1	0	1	0		2	980
2	62	1	0	1	1	1	0	0	0	1	0	1	0	0	0		1	981
2	52	1	0	1	1	1	0	0	0	1	0	0	1	0	0		1	982
2	53	1	0	0	0	0	0	0	0	1	0	0	0	0	0	1	1	983
5	15	1	0	0	0	0	0	0	0	1	0	0	0	0	1	1	3	984
5	58	1	0	0	1	0	1	0	0	0	0	0	1	1	1		1	985
2	71	1	0	1	1	1	0	0	0	1	1	0	1	0	1		1	986
2	55	1	0	1	0	0	0	0	0	0	0	0	1	0	0	1	1	987
2	52	1	0	1	1	0	0	0	0	1	0	0	0	1	0		2	988
2	60	1	0	0	0	0	0	0	0	0	0	0	0	1	0	1	2	989
1	28	1	0	1	0	1	0	0	0	1	0	0	0	0	1	1	3	990
2	77	1	0	0	0	0	0	0	0	1	0	0	0	0	0	1	3	991
5	68	1	0	0	0	0	0	0	0	1	0	0	0	0	0	1	2	992
1	19	1	0	1	0	0	0	1	0	1	0	0	0	0	0	1	2	993
1	56	1	0	1	0	0	0	1	0	1	0	0	0	0	0	1	1	994
2	0.2	1	0	1	0	0	0	0	0	1	0	0	0	0	0	1	1	995
2	48	1	0	1	1	1	0	0	0	1	0	1	1	0	0		2	996
2	48	1	0	0	0	0	0	0	0	1	0	0	0	0	1	1	2	997
3	56	1	0	1	1	0	0	0	0	1	1	0	0	0	0		2	998
5	34	1	0	1	1	0	1	0	0	1	0	0	1	0	0		2	999
2	48	1	0	0	0	1	0	0	0	1	0	1	1	1	0	1	1	1000
5	11	1	0	0	0	1	0	0	0	1	1	1	0	1	0	1	1	1001
1	60	1	0	1	0	0	0	0	0	1	1	0	0	0	0	1	3	1002
1	61	1	0	1	0	0	0	0	0	1	0	0	1	0	0	1	3	1003
5	65	1	0	1	0	0	0	0	0	1	1	0	0	1	1	1	3	1004
1	52	1	0	1	1	1	1	0	0	0	1	1	0	1	0		1	1005
2	67	1	0	1	1	1	0	0	0	0	0	1	0	1	0		1	1006
2	63	1	0	1	1	1	0	0	0	0	0	0	1	0	0		1	1007
2	65	1	0	1	1	1	1	0	0	1	0	0	1	1	0		1	1008
2	59	1	0	1	1	1	0	0	0	0	1	0	1	1	0		1	1009
5	40	1	0	1	1	1	0	0	0	0	0	0	1	0	0		3	1010
5	36	1	0	0	1	1	0	0	0	0	0	0	1	0	0		3	1011
2	28	1	0	1	1	1	0	0	0	0	1	0	1	1	0		2	1012
5	48	1	0	1	1	0	0	0	0	1	0	0	0	0	1		2	1013
2	53	1	0	1	1	0	0	0	0	0	0	0	0	0	0		2	1014
1	61	1	0	1	0	0	0	0	0	1	0	0	1	0	0	1	2	1015
2	44	1	0	1	0	1	0	0	0	1	0	0	1	0	0	1	2	1016
3	29	1	0	0	0	0	0	0	0	1	0	0	0	1	0	1	3	1017
2	67	1	0	1	0	0	0	0	0	1	0	0	0	0	0	1	2	1018
2	65	1	0	0	0	0	0	0	0	1	0	0	0	0	1	1	1	1019
1	48	1	0	1	0	0	0	0	0	1	1	1	0	0	0	1	2	1020
1	45	1	0	0	0	0	0	0	0	1	0	0	0	0	0	1	1	1021
5	5	1	0	0	1	0	1	0	0	1	1	0	0	1	0		1	1022
2	66	1	0	1	0	1	0	0	0	1	0	0	0	0	0	1	2	1023
2	57	1	0	1	0	1	0	0	0	1	0	0	0	1	0	1	2	1024
5	63	1	0	1	0	0	0	0	0	1	0	1	0	1	0	1	3	1025
5	61	1	0	0	1	0	0	0	0	0	0	0	0	0	0		3	1026
5	22	1	0	1	0	0	0	0	0	1	0	0	0	0	0	1	2	1027
2	64	1	0	1	1	1	0	0	0	0	0	0	0	0	0		2	1028
5	32	1	0	0	1	0	0	0	0	1	0	0	0	0	1		2	1029
2	35	1	0	0	1	1	1	0	0	1	0	0	0	1	0		2	1030
5	76	1	0	0	0	0	0	0	0	1	1	0	1	1	0	1	1	1031
2	63	1	0	0	1	1	0	0	0	1	0	0	1	0	0		2	1032
1	56	1	0	1	1	0	0	0	1	1	1	1	1	1	0		3	1033
1	32	1	0	1	1	0	0	0	1	1	0	0	1	1	0		2	1034
2	28	0	0	1	1	1	1	0	0	1	1	1	1	1	0		2	1035
5	26	1	0	0	0	0	0	0	0	1	0	0	0	1	0	1	3	1036
2	11	1	0	0	0	1	0	0	0	1	1	0	0	1	0	1	1	1037
2	62	1	0	1	0	0	0	0	0	1	0	0	1	0	0	1	1	1038
5	53	1	0	1	0	0	0	0	0	1	1	0	0	0	1	1	2	1039
2	70	1	0	1	0	0	0	0	0	1	0	0	0	1	1	1	1	1040
2	66	1	0	1	0	1	0	0	0	1	1	0	1	0	0	1	1	1041
3	28	1	0	1	0	0	0	0	1	1	1	1	0	1	0	1	3	1042
1	17	1	0	1	0	0	0	0	0	0	0	0	0	0	1	1	3	1043
5	25	1	0	1	0	0	1	0	0	1	1	1	1	1	0	1	2	1044
5	54	1	0	0	1	0	1	0	0	0	0	0	1	1	0		1	1045
3	27	1	0	1	1	0	0	0	0	1	0	0	0	1	1		3	1046
1	30	1	0	1	0	0	0	0	0	1	1	0	0	0	0	1	3	1047
5	66	1	0	0	0	1	0	0	0	1	0	1	0	0	0	1	1	1048
5	41	1	0	0	1	0	0	0	0	0	0	0	1	0	1		2	1049
2	68	1	0	0	1	0	0	0	0	1	1	1	0	1	1		2	1050
3	34	1	0	1	1	0	1	0	0	1	1	0	0	1	0		2	1051
2	48	1	0	1	1	1	0	0	0	1	0	0	1	0	0		1	1052
2	63	1	0	1	0	0	0	0	0	1	0	0	1	0	0	1	1	1053
5	55	1	0	1	1	0	1	0	0	0	0	0	1	1	0		2	1054
5	83	1	0	1	1	0	0	0	0	0	1	0	1	0	0		3	1055
5	65	1	0	0	0	0	0	0	0	1	0	1	0	0	0	1	3	1056
2	48	1	0	1	1	0	0	0	0	0	0	1	1	1	0		2	1057
2	49	1	0	0	1	0	0	0	0	0	0	1	1	1	0		1	1058
2	69	1	0	1	1	0	0	0	0	0	1	1	1	1	0		1	1059
2	80	1	0	1	1	1	0	0	0	1	1	1	1	1	0		3	1060
2	52	1	1	1	1	1	0	0	0	1	1	1	1	1	0		1	1061
2	50	1	1	1	1	1	0	1	0	1	0	0	0	1	0		2	1062
2	49	1	0	0	1	0	0	0	0	1	1	1	1	1	0		2	1063
2	33	1	0	1	1	0	0	0	0	1	1	1	0	0	0		3	1064
2	41	1	0	1	1	1	0	1	0	1	1	1	0	0	0		3	1065
2	48	1	0	0	1	0	0	0	0	1	0	1	1	0	0		3	1066
2	62	1	0	0	1	0	0	0	0	1	0	1	1	0	0		1	1067
2	59	1	0	0	1	0	0	0	0	1	0	1	1	0	0		1	1068
2	62	1	1	0	1	1	0	0	0	1	0	1	1	0	0		1	1069
2	30	1	1	1	1	1	0	0	0	0	0	0	1	0	0		3	1070
2	28	1	1	1	1	0	1	0	0	1	0	0	0	0	0		2	1071
2	50	1	1	1	1	0	1	0	0	0	0	0	1	0	0		2	1072
2	60	1	0	0	1	0	0	0	0	0	0	0	1	0	0		1	1073
2	27	1	1	1	1	0	1	0	0	0	0	0	1	0	0		2	1074
2	53	0	1	0	1	0	1	0	0	0	0	0	1	0	1		2	1075
2	61	1	1	1	1	1	0	0	0	1	1	1	0	1	0		2	1076
2	37	1	1	1	1	1	0	0	0	1	0	0	0	0	0		3	1077
2	39	1	0	0	1	0	0	0	0	1	0	0	0	0	0		3	1078
2	26	1	0	1	1	0	1	0	0	1	0	0	0	0	0		2	1079
2	24	1	0	0	1	0	1	0	0	1	0	0	0	0	0		2	1080
2	53	1	0	0	1	0	0	0	0	1	0	0	0	0	0		2	1081
2	50	1	1	1	1	0	1	0	0	0	0	0	0	0	0		2	1082
2	36	1	0	1	1	1	0	0	0	1	0	0	0	0	0		2	1083
2	34	1	0	1	1	1	0	0	0	0	0	0	0	0	1		2	1084
5	18	0	0	1	1	0	0	0	0	1	0	0	0	0	0		2	1085
2	33	1	0	1	1	0	0	0	0	0	0	0	0	0	0		2	1086
2	37	1	0	1	1	1	0	0	0	0	0	0	0	0	0		2	1087
2	35	1	0	1	1	1	0	0	0	0	0	0	0	0	0		2	1088
2	50	1	1	1	1	0	1	0	0	0	0	0	0	0	0		2	1089
2	47	1	1	1	1	0	0	0	0	1	0	0	0	0	0		2	1090
2	47	1	0	1	1	1	0	0	0	1	0	0	0	0	0		1	1091
2	31	1	1	1	1	0	0	0	1	1	0	0	1	0	0		2	1092
2	58	1	1	0	1	0	0	0	0	0	0	0	0	0	0		1	1093
2	65	1	0	0	1	1	0	0	0	1	0	0	0	0	0		1	1094
2	31	1	0	0	1	1	0	0	0	0	0	0	0	0	0		3	1095
2	71	1	0	1	1	1	0	0	0	1	0	0	0	0	0		1	1096
2	68	1	1	0	1	1	0	0	0	1	0	0	1	0	0		1	1097
2	48	1	0	1	1	0	0	0	0	0	1	0	0	1	0		1	1098
2	54	1	0	0	1	1	0	0	0	0	0	0	1	0	0		2	1099
2	63	1	0	0	1	1	0	0	0	1	1	0	0	0	0		1	1100
2	51	1	0	1	1	0	0	0	0	1	0	0	1	1	0		2	1101
2	66	1	0	0	1	1	0	0	0	1	0	0	0	1	0		2	1102
2	68	1	1	1	1	1	0	0	0	1	1	1	1	1	0		2	1103
2	73	1	1	0	1	1	0	0	0	1	1	1	1	1	0		1	1104
2	51	1	1	0	0	1	0	0	0	1	1	1	1	1	0	1	2	1105
2	51	1	0	0	1	0	1	0	0	0	0	0	1	1	0		2	1106
2	63	1	0	1	1	0	1	0	0	0	0	0	0	1	0		2	1107
2	62	1	0	0	1	0	1	0	0	0	0	0	0	1	0		2	1108
2	30	1	0	1	1	0	1	0	0	0	0	0	0	1	0		2	1109
2	23	1	0	0	1	0	1	0	0	0	0	0	0	0	0		2	1110
2	31	1	0	0	1	0	1	0	0	0	0	0	0	0	0		2	1111
2	77	1	0	0	1	1	0	0	0	1	0	0	0	1	0		1	1112
2	32	1	1	0	1	0	0	1	0	1	0	0	0	0	0		2	1113
2	55	1	0	1	1	0	1	0	0	1	0	0	0	0	0		2	1114
2	67	1	1	0	1	0	1	0	0	0	0	0	1	0	0		1	1115
5	58	1	0	0	1	0	0	0	0	1	0	0	0	0	0		1	1116
2	27	1	1	1	1	0	0	1	0	0	0	0	0	0	0		3	1117
2	40	1	1	1	1	0	0	1	0	1	1	0	1	1	0		3	1118
2	47	1	1	1	1	0	0	1	0	1	1	1	0	0	0		2	1119
2	47	1	0	1	1	0	0	1	0	0	0	0	1	0	0		2	1120
2	61	1	1	1	1	1	0	0	0	1	0	0	0	0	0		1	1121
5	57	1	0	0	1	0	0	0	0	1	0	0	0	0	0		1	1122
2	28	1	0	1	1	0	1	0	0	1	0	0	0	0	0		2	1123
2	53	1	1	1	1	0	0	1	0	0	0	0	1	0	0		2	1124
2	23	1	1	1	1	0	1	0	0	1	0	1	0	0	0		2	1125
1	29	1	0	1	1	0	0	0	0	1	0	0	0	0	0		3	1126
5	4	1	0	0	1	0	0	0	0	1	0	0	1	0	0		1	1127
2	33	1	0	1	1	0	0	1	0	0	0	0	1	0	0		2	1128
2	27	1	0	1	1	0	0	1	0	0	1	0	0	1	0		2	1129
1	21	1	0	1	1	0	0	1	0	0	0	0	0	0	0		3	1130
1	34	1	0	1	1	1	0	0	0	0	0	0	1	0	0		3	1131
1	23	1	0	1	1	1	0	0	0	0	0	0	0	0	0		3	1132
1	33	1	0	1	1	0	0	0	0	0	0	0	0	0	1		2	1133
5	47	1	0	1	1	1	0	0	0	0	1	0	1	1	0		2	1134
1	58	1	0	1	1	1	0	0	0	0	0	0	0	0	0		2	1135
1	45	1	0	1	1	0	0	1	0	0	0	0	0	0	0		3	1136
1	32	1	0	1	1	1	0	0	0	0	0	0	0	0	0		2	1137
2	25	1	0	1	1	1	0	0	0	0	0	0	0	0	0		3	1138
2	42	1	0	1	1	1	0	0	0	0	0	0	1	1	0		1	1139
1	28	1	0	0	1	1	0	0	0	0	0	0	0	0	0		3	1140
1	42	1	1	1	1	1	0	0	0	1	0	1	0	0	0		2	1141
1	42	1	0	1	1	1	0	0	0	1	0	0	0	0	0		3	1142
1	30	1	0	1	1	0	0	1	0	0	0	0	0	0	0		2	1143
1	59	1	0	0	1	1	0	0	0	0	0	0	0	0	0		3	1144
4	31	1	0	1	1	1	0	0	0	0	0	0	0	0	0		2	1145
1	37	1	0	1	1	1	0	0	0	0	0	0	0	0	0		3	1146
2	53	1	0	1	1	1	0	0	0	0	1	0	1	0	0		2	1147
5	31	1	0	1	1	1	0	0	0	0	0	0	0	0	0		3	1148
4	24	1	0	1	1	1	0	0	0	0	0	0	0	0	0		3	1149
1	56	1	0	1	1	0	0	0	0	0	0	0	0	0	0		3	1150
1	49	1	0	1	1	0	0	1	0	0	0	0	0	0	0		2	1151
1	33	1	0	1	1	0	0	1	0	0	0	0	0	0	0		3	1152
4	37	1	0	1	1	1	0	0	0	0	0	0	0	0	0		2	1153
1	44	1	0	1	1	0	0	0	0	1	1	0	0	0	0		2	1154
1	72	1	1	1	1	0	0	0	0	1	1	0	0	0	0		3	1155
2	73	1	0	0	1	0	0	0	0	0	0	0	0	0	0		1	1156
2	53	1	0	1	1	0	0	0	0	1	1	0	0	0	0		2	1157
5	55	1	1	1	1	0	0	0	0	1	1	0	0	0	0		3	1158
2	70	1	0	1	1	0	0	0	0	1	1	0	0	0	0		1	1159
2	50	1	1	1	1	1	0	1	0	0	0	0	0	0	0		2	1160
2	55	1	0	1	1	0	1	0	0	0	0	0	0	1	0		2	1161
2	48	1	0	1	1	0	0	1	0	0	0	0	1	0	0		2	1162
2	49	1	1	0	1	0	0	1	0	1	0	1	0	0	0		2	1163
2	48	1	0	0	1	0	0	1	0	1	0	1	0	0	0		2	1164
2	47	1	0	1	1	0	0	1	0	0	0	0	0	1	0		2	1165
5	50	1	1	0	1	0	0	0	0	1	0	1	0	0	0		2	1166
2	62	1	1	1	1	0	0	0	0	0	0	0	0	1	0		1	1167
2	58	1	1	0	1	0	0	0	0	0	0	0	0	1	0		1	1168
4	49	1	0	1	1	1	0	0	0	0	0	0	1	1	0		2	1169
2	58	1	0	1	1	0	0	1	0	1	0	1	0	0	1		1	1170
2	54	1	0	0	1	0	0	1	0	1	0	1	0	0	0		2	1171
2	33	1	0	1	1	0	1	0	0	1	0	1	0	1	0		2	1172
2	30	1	0	0	1	0	0	0	0	1	0	0	0	0	0		2	1173
2	50	1	0	1	1	0	0	1	0	0	0	0	0	1	0		2	1174
2	48	1	0	0	1	0	0	0	0	0	0	0	0	0	0		2	1175
2	32	1	1	1	1	0	0	1	0	1	0	1	0	0	1		2	1176
2	21	1	0	1	1	0	0	1	0	1	0	1	1	0	0		2	1177
2	58	1	1	1	1	1	0	0	0	1	0	1	1	1	0		2	1178
2	74	1	0	0	1	1	0	0	0	1	1	1	0	1	0		2	1179
2	59	1	1	0	1	0	0	0	0	1	1	1	0	0	0		1	1180
2	1	1	0	0	0	0	0	0	0	1	0	0	0	0	0	1	2	1181
1	45	1	0	0	0	1	0	0	0	0	0	0	0	0	0	0	2	1182
1	45	1	0	0	0	1	0	0	0	0	0	0	0	0	0	0	2	1183
1	45	1	0	0	0	1	0	0	0	0	0	0	0	0	0	0	2	1184
1	45	1	0	1	0	1	0	0	0	0	0	0	0	0	0	0	2	1185
1	45	1	0	1	0	1	0	0	0	0	0	0	0	0	0	0	2	1186
1	61	1	0	1	0	1	0	0	0	0	0	0	0	0	0	0	2	1187
1	45	1	0	1	0	1	0	0	0	0	0	0	0	0	0	0	2	1188
2	45	1	0	0	0	1	0	0	0	0	0	0	0	0	0	0	2	1189
2	45	1	0	1	0	1	0	0	0	0	0	0	0	0	0	0	2	1190
1	60	1	0	1	0	1	0	0	0	0	0	0	0	0	0	0	2	1191
1	50	1	0	1	0	1	0	0	0	0	0	0	0	0	0	0	2	1192
2	37	1	0	1	0	1	0	0	0	0	0	0	0	0	0	0	2	1193
1	45	1	0	1	0	1	0	0	0	0	0	0	0	0	0	0	2	1194
1	39	1	0	1	0	1	0	0	0	0	0	0	0	0	0	0	2	1195
1	45	1	0	0	0	1	0	0	0	0	0	0	0	0	0	0	2	1196
1	45	1	0	0	0	1	0	0	0	0	0	0	0	0	0	0	2	1197
2	31	1	0	1	0	1	0	0	0	0	0	0	0	0	0	0	2	1198
1	45	1	0	1	0	1	0	0	0	0	0	0	0	0	0	0	2	1199
2	56	1	0	1	0	1	0	0	0	0	0	0	0	0	0	0	2	1200
1	46	1	0	1	0	1	0	0	0	0	0	0	0	0	0	0	2	1201
1	50	1	0	1	0	1	0	0	0	0	0	0	0	0	0	0	2	1202
1	56	1	0	0	0	1	0	0	0	0	0	0	0	0	0	0	2	1203
1	56	1	0	1	0	1	0	0	0	0	0	0	0	0	0	0	2	1204
1	30	1	0	1	0	1	0	0	0	0	0	0	0	0	0	0	2	1205
1	56	1	0	1	0	1	0	0	0	0	0	0	0	0	0	0	2	1206
1	29	1	0	1	0	1	0	0	0	0	0	0	0	0	0	0	2	1207
1	56	1	0	1	0	1	0	0	0	0	0	0	0	0	0	0	2	1208
1	48	1	0	1	0	1	0	0	0	0	0	0	0	0	0	0	2	1209
1	45	1	0	1	0	1	0	0	0	0	0	0	0	0	0	0	2	1210
1	45	1	0	1	0	1	0	0	0	0	0	0	0	0	0	0	2	1211
1	51	1	0	1	0	1	0	0	0	0	0	0	0	0	0	0	2	1212
1	45	1	0	1	0	1	0	0	0	0	0	0	0	0	0	0	2	1213
1	35	1	0	1	0	1	0	0	0	0	0	0	0	0	0	0	2	1214
1	23	1	0	0	0	1	0	0	0	0	0	0	0	0	0	0	2	1215
2	25	1	0	1	0	1	0	0	0	0	0	0	0	0	0	0	2	1216
2	38	1	0	1	0	1	0	0	0	0	0	0	0	0	0	0	2	1217
1	37	1	0	1	0	1	0	0	0	0	0	0	0	0	0	0	2	1218
1	39	1	0	1	0	1	0	0	0	0	0	0	0	0	0	0	2	1219
2	38	1	0	1	0	1	0	0	0	0	0	0	0	0	0	0	2	1220
1	38	1	0	1	0	1	0	0	0	0	0	0	0	0	0	0	2	1221
1	38	1	0	1	0	1	0	0	0	0	0	0	0	0	0	0	2	1222
1	38	1	0	1	0	1	0	0	0	0	0	0	0	0	0	0	2	1223
1	38	1	0	1	0	1	0	0	0	0	0	0	0	0	0	0	2	1224
1	54	1	0	1	0	1	0	0	0	0	0	0	0	0	0	0	2	1225
2	54	1	0	1	0	1	0	0	0	0	0	0	0	0	0	0	2	1226
1	54	1	0	0	0	1	0	0	0	0	0	0	0	0	0	0	2	1227
2	54	1	0	1	0	1	0	0	0	0	0	0	0	0	0	0	2	1228
1	52	1	0	1	0	1	0	0	0	0	0	0	0	0	0	0	2	1229
1	54	1	0	1	0	0	0	0	1	0	0	0	0	0	0	0	2	1230
1	54	1	0	1	0	1	0	0	0	0	0	0	0	0	0	0	2	1231
1	54	1	0	1	0	0	0	1	0	0	0	0	0	0	0	0	2	1232
1	48	1	0	1	0	1	0	0	0	0	0	0	0	0	0	0	2	1233
1	54	1	0	1	0	0	0	1	0	0	0	0	0	0	0	0	2	1234
1	54	1	0	0	0	1	0	0	0	0	0	0	0	0	0	0	2	1235
1	59	1	0	1	0	1	0	0	0	0	0	0	0	0	0	0	2	1236
1	34	1	0	1	0	0	0	1	0	0	0	0	0	0	0	0	2	1237
1	47	1	0	1	0	0	0	0	1	0	0	0	0	0	0	0	2	1238
2	59	1	0	1	0	1	0	0	0	0	0	0	0	0	0	0	2	1239
1	59	1	0	1	0	1	0	0	0	0	0	0	0	0	0	0	2	1240
1	59	1	0	1	0	1	0	0	0	0	0	0	0	0	0	0	2	1241
1	59	1	0	1	0	1	0	0	0	0	0	0	0	0	0	0	2	1242
1	59	1	0	1	0	1	0	0	0	0	0	0	0	0	0	0	2	1243
1	48	1	0	0	0	1	0	0	0	0	0	0	0	0	0	0	2	1244
2	46	1	0	1	0	1	0	0	0	0	0	0	0	0	0	0	2	1245
1	46	1	0	1	0	1	0	0	0	0	0	0	0	0	0	0	2	1246
1	60	1	0	1	0	0	0	1	0	0	0	0	0	0	0	0	2	1247
1	60	1	0	0	0	1	0	0	0	0	0	0	0	0	0	0	2	1248
1	60	1	0	1	0	1	0	0	0	0	0	0	0	0	0	0	2	1249
1	43	1	0	1	0	1	0	0	0	0	0	0	0	0	0	0	2	1250
1	60	1	0	0	0	1	0	0	0	0	0	0	0	0	0	0	3	1251
1	60	1	0	1	0	1	0	0	0	0	0	0	0	0	0	0	3	1252
1	46	1	0	1	0	1	0	0	0	0	0	0	0	0	0	0	3	1253
1	50	1	0	0	0	0	0	0	1	0	0	0	0	0	0	0	2	1254
1	51	1	0	1	0	0	0	0	1	0	0	0	0	0	0	0	2	1255
1	56	1	0	1	0	1	0	0	0	0	0	0	0	0	0	0	3	1256
1	59	1	0	1	0	1	0	0	0	0	0	0	0	0	0	0	2	1257
1	52	1	0	1	0	0	0	1	0	0	0	0	0	0	0	0	2	1258
1	54	1	0	1	0	1	0	0	0	0	0	0	0	0	0	0	2	1259
2	33	1	0	1	0	1	0	0	0	0	0	0	0	0	0	0	2	1260
2	50	1	0	1	0	1	0	0	0	0	0	0	0	0	0	0	2	1261
1	48	1	0	0	0	1	0	0	0	0	0	0	0	0	0	0	2	1262
1	56	1	0	1	0	1	0	0	0	0	0	0	0	0	0	0	2	1263
1	53	1	0	1	0	1	0	0	0	0	0	0	0	0	0	0	2	1264
1	58	1	0	1	0	1	0	0	0	0	0	0	0	0	0	0	2	1265
1	45	1	0	1	0	1	0	0	0	0	0	0	0	0	0	0	2	1266
1	48	1	0	1	0	1	0	0	0	0	0	0	0	0	0	0	2	1267
1	47	1	0	1	0	1	0	0	0	0	0	0	0	0	0	0	2	1268
1	41	1	0	1	0	1	0	0	0	0	0	0	0	0	0	0	2	1269
2	42	1	0	1	0	1	0	0	0	0	0	0	0	0	0	0	2	1270
1	46	1	0	1	0	1	0	0	0	0	0	0	0	0	0	0	2	1271
1	39	1	0	1	0	1	0	0	0	0	0	0	0	0	0	0	2	1272
1	49	1	0	1	0	1	0	0	0	0	0	0	0	0	0	0	2	1273
1	42	1	0	1	0	1	0	0	0	0	0	0	0	0	0	0	2	1274
1	46	1	0	1	0	1	0	0	0	0	0	0	0	0	0	0	2	1275
1	48	1	0	1	0	1	0	0	0	0	0	0	0	0	0	0	2	1276
1	49	1	0	1	0	1	0	0	0	0	0	0	0	0	0	0	2	1277
1	42	1	0	0	0	1	0	0	0	0	0	0	0	0	0	0	2	1278
1	34	1	0	1	0	1	0	0	0	0	0	0	0	0	0	0	2	1279
1	33	1	0	0	0	1	0	0	0	0	0	0	0	0	0	0	2	1280
1	46	1	0	0	0	0	0	1	0	0	0	0	0	0	0	0	2	1281
1	33	1	0	1	0	0	0	1	0	0	0	0	0	0	0	0	2	1282
1	33	1	0	1	0	1	0	0	0	0	0	0	0	0	0	0	2	1283
1	46	1	0	0	0	1	0	0	0	0	0	0	0	0	0	0	2	1284
1	48	1	0	1	0	0	0	1	0	0	0	0	0	0	0	0	2	1285
1	38	1	0	1	0	0	0	1	0	0	0	0	0	0	0	0	2	1286
1	35	1	0	1	0	1	0	0	0	0	0	0	0	0	0	0	2	1287
1	52	1	0	1	0	1	0	0	0	0	0	0	0	0	0	0	2	1288
4	37	1	0	1	0	1	0	0	0	0	0	0	0	0	0	0	2	1289
1	35	1	0	1	0	1	0	0	0	0	0	0	0	0	0	0	2	1290
1	30	1	0	0	0	1	0	0	0	0	0	0	0	0	0	0	2	1291
1	52	1	0	1	0	1	0	0	0	0	0	0	0	0	0	0	2	1292
1	54	1	0	0	0	1	0	0	0	0	0	0	0	0	0	0	2	1293
4	35	1	0	1	0	1	0	0	0	0	0	0	0	0	0	0	2	1294
1	39	1	0	1	0	1	0	0	0	0	0	0	0	0	0	0	2	1295
1	59	1	0	1	0	0	0	1	0	0	0	0	0	0	0	0	2	1296
2	50	1	0	1	0	1	0	0	0	0	0	0	0	0	0	0	2	1297
1	29	1	0	1	0	1	0	0	0	0	0	0	0	0	0	0	2	1298
1	37	1	0	1	0	1	0	0	0	0	0	0	0	0	0	0	2	1299
1	38	1	0	1	0	1	0	0	0	0	0	0	0	0	0	0	2	1300
1	29	1	0	0	0	1	0	0	0	0	0	0	0	0	0	0	2	1301
1	45	1	0	1	0	1	0	0	0	0	0	0	0	0	0	0	2	1302
1	48	1	0	1	0	1	0	0	0	0	0	0	0	0	0	0	2	1303
1	39	1	0	1	0	1	0	0	0	0	0	0	0	0	0	0	2	1304
1	23	1	0	1	0	1	0	0	0	0	0	0	0	0	0	0	2	1305
2	54	1	0	1	0	1	0	0	0	0	0	0	0	0	0	0	2	1306
1	34	1	0	1	0	1	0	0	0	0	0	0	0	0	0	0	2	1307
1	48	1	0	0	0	1	0	0	0	0	0	0	0	0	0	0	2	1308
1	52	1	0	0	0	1	0	0	0	0	0	0	0	0	0	0	2	1309
1	59	1	0	1	0	1	0	0	0	0	0	0	0	0	0	0	2	1310
1	28	1	0	1	0	1	0	0	0	0	0	0	0	0	0	0	2	1311
1	27	1	0	1	0	1	0	0	0	0	0	0	0	0	0	0	2	1312
4	31	1	0	1	0	1	0	0	0	0	0	0	0	0	0	0	2	1313
4	38	1	0	1	0	1	0	0	0	0	0	0	0	0	0	0	2	1314
1	25	1	0	0	0	1	0	0	0	0	0	0	0	0	0	0	2	1315
1	22	1	0	1	0	1	0	0	0	0	0	0	0	0	0	0	2	1316
1	23	1	0	1	0	1	0	0	0	0	0	0	0	0	0	0	2	1317
1	46	1	0	1	0	1	0	0	0	0	0	0	0	0	0	0	2	1318
1	52	1	0	1	0	1	0	0	0	0	0	0	0	0	0	0	2	1319
1	54	1	0	1	0	1	0	0	0	0	0	0	0	0	0	0	2	1320
4	58	1	0	1	0	1	0	0	0	0	0	0	0	0	0	0	2	1321
1	33	1	0	1	0	1	0	0	0	0	0	0	0	0	0	0	2	1322
1	41	1	0	1	0	1	0	0	0	0	0	0	0	0	0	0	2	1323
1	48	1	0	1	0	1	0	0	0	0	0	0	0	0	0	0	2	1324
1	59	1	0	1	0	1	0	0	0	0	0	0	0	0	0	0	2	1325
1	52	1	0	1	0	1	0	0	0	0	0	0	0	0	0	0	2	1326
1	31	1	0	0	0	1	0	0	0	0	0	0	0	0	0	0	2	1327
1	58	1	0	1	0	1	0	0	0	0	0	0	0	0	0	0	2	1328
2	35	1	0	1	0	1	0	0	0	0	0	0	0	0	0	0	2	1329
1	50	1	0	1	0	1	0	0	0	0	0	0	0	0	0	0	2	1330
1	30	1	0	0	0	1	0	0	0	0	0	0	0	0	0	0	2	1331
1	20	1	0	0	0	1	0	0	0	0	0	0	0	0	0	0	2	1332
1	48	1	0	1	0	1	0	0	0	0	0	0	0	0	0	0	2	1333
1	56	1	0	0	0	1	0	0	0	0	0	0	0	0	0	0	2	1334
1	39	1	0	0	0	1	0	0	0	0	0	0	0	0	0	0	2	1335
1	36	1	0	1	0	1	0	0	0	0	0	0	0	0	0	0	2	1336
2	49	1	0	1	0	1	0	0	0	0	0	0	0	0	0	0	2	1337
2	32	1	0	1	0	1	0	0	0	0	0	0	0	0	0	0	2	1338
2	46	1	0	1	0	1	0	0	0	0	0	0	0	0	0	0	2	1339
1	55	1	0	1	0	1	0	0	0	0	0	0	0	0	0	0	2	1340
1	52	1	0	0	0	1	0	0	0	0	0	0	0	0	0	0	2	1341
4	54	1	0	1	0	1	0	0	0	0	0	0	0	0	0	0	2	1342
1	58	1	0	1	0	1	0	0	0	0	0	0	0	0	0	0	2	1343
1	32	1	0	1	0	1	0	0	0	0	0	0	0	0	0	0	2	1344
1	52	1	0	1	0	1	0	0	0	0	0	0	0	0	0	0	2	1345
1	42	1	0	1	0	1	0	0	0	0	0	0	0	0	0	0	2	1346
4	46	1	0	1	0	1	0	0	0	0	0	0	0	0	0	0	2	1347
4	48	1	0	1	0	1	0	0	0	0	0	0	0	0	0	0	2	1348
4	40	1	0	1	0	1	0	0	0	0	0	0	0	0	0	0	2	1349
1	34	1	0	1	0	1	0	0	0	0	0	0	0	0	0	0	2	1350
1	58	1	0	0	0	1	0	0	0	0	0	0	0	0	0	0	2	1351
1	43	1	0	1	0	1	0	0	0	0	0	0	0	0	0	0	2	1352
1	27	1	0	1	0	1	0	0	0	0	0	0	0	0	0	0	2	1353
1	52	1	0	1	0	1	0	0	0	0	0	0	0	0	0	0	2	1354
1	31	1	0	0	0	1	0	0	0	0	0	0	0	0	0	0	2	1355
1	58	1	0	0	0	1	0	0	0	0	0	0	0	0	0	0	2	1356
1	56	1	0	1	0	1	0	0	0	0	0	0	0	0	0	0	2	1357
4	52	1	0	1	0	1	0	0	0	0	0	0	0	0	0	0	2	1358
1	42	1	0	1	0	1	0	0	0	0	0	0	0	0	0	0	2	1359
1	46	1	0	0	0	1	0	0	0	0	0	0	0	0	0	0	2	1360
1	48	1	0	0	0	1	0	0	0	0	0	0	0	0	0	0	2	1361
1	49	1	0	0	0	1	0	0	0	0	0	0	0	0	0	0	2	1362
1	23	1	0	0	0	1	0	0	0	0	0	0	0	0	0	0	2	1363
1	31	1	0	1	0	1	0	0	0	0	0	0	0	0	0	0	2	1364
1	48	1	0	1	0	1	0	0	0	0	0	0	0	0	0	0	2	1365
2	33	1	0	1	0	1	0	0	0	0	0	0	0	0	0	0	2	1366
1	46	1	0	1	0	1	0	0	0	0	0	0	0	0	0	0	2	1367
1	42	1	0	1	0	1	0	0	0	0	0	0	0	0	0	0	2	1368
1	44	1	0	0	0	1	0	0	0	0	0	0	0	0	0	0	2	1369
1	33	1	0	0	0	1	0	0	0	0	0	0	0	0	0	0	2	1370
1	43	1	0	1	0	1	0	0	0	0	0	0	0	0	0	0	2	1371
1	50	1	0	1	0	1	0	0	0	0	0	0	0	0	0	0	2	1372
1	37	1	0	0	0	1	0	0	0	0	0	0	0	0	0	0	2	1373
1	47	1	0	0	0	1	0	0	0	0	0	0	0	0	0	0	2	1374
1	46	1	0	0	0	1	0	0	0	0	0	0	0	0	0	0	2	1375
1	48	1	0	0	0	1	0	0	0	0	0	0	0	0	0	0	2	1376
1	50	1	0	1	0	1	0	0	0	0	0	0	0	0	0	0	2	1377
1	59	1	0	1	0	1	0	0	0	0	0	0	0	0	0	0	2	1378
1	46	1	0	1	0	1	0	0	0	0	0	0	0	0	0	0	2	1379
1	48	1	0	0	0	1	0	0	0	0	0	0	0	0	0	0	2	1380
1	35	1	0	1	0	1	0	0	0	0	0	0	0	0	0	0	2	1381
1	36	1	0	1	0	1	0	0	0	0	0	0	0	0	0	0	2	1382
1	33	1	0	1	0	1	0	0	0	0	0	0	0	0	0	0	2	1383
1	31	1	0	1	0	1	0	0	0	0	0	0	0	0	0	0	2	1384
1	49	1	0	1	1	1	0	0	0	0	0	1	0	0	0		1	1385
1	46	1	1	1	1	1	0	0	0	0	0	0	1	1	0		2	1386
1	45	1	0	0	1	1	0	0	0	0	0	0	0	0	0		3	1387
1	41	1	0	1	1	1	0	0	0	0	0	1	0	1	0		3	1388
1	52	1	1	1	1	1	0	0	0	0	0	0	0	0	0		2	1389
1	60	1	0	1	1	1	0	0	0	0	0	0	0	0	0		2	1390
1	40	1	1	1	1	1	0	0	0	1	1	1	1	1	0		2	1391
1	21	1	0	0	1	1	0	0	0	0	0	0	0	0	0		3	1392
1	21	1	0	1	1	1	0	0	0	0	0	0	0	0	0		3	1393
1	70	1	0	0	1	1	0	0	0	0	0	0	0	0	0		2	1394
4	21	1	0	1	1	1	0	0	0	0	0	0	0	0	0		3	1395
1	31	1	0	1	1	1	0	0	0	0	0	0	0	0	0		3	1396
1	31	1	0	1	1	1	0	0	0	0	0	0	0	0	0		2	1397
4	36	1	0	1	1	1	0	0	0	0	0	0	0	0	0		3	1398
4	24	1	0	1	1	1	0	0	0	0	0	0	0	0	0		2	1399
1	40	1	1	1	1	0	0	0	0	0	0	0	0	0	0		2	1400
1	22	1	0	1	1	1	0	0	0	0	0	0	0	0	0		3	1401
4	22	1	0	1	1	1	0	0	0	0	0	0	0	0	0		3	1402
1	22	1	0	1	1	1	0	0	0	0	0	0	0	0	0		3	1403
4	20	1	0	1	1	1	0	0	0	0	0	0	0	0	0		3	1404
1	33	1	0	1	1	0	0	1	0	0	0	0	0	0	0		3	1405
2	34	1	0	1	1	1	0	0	0	0	0	0	0	0	0		2	1406
2	23	1	0	1	1	1	0	0	0	0	0	0	0	0	0		3	1407
1	60	1	1	1	1	1	0	0	0	0	0	0	0	0	0		2	1408
1	21	1	0	1	1	1	0	0	0	0	0	0	0	0	0		3	1409
1	37	1	0	1	1	1	0	0	0	0	1	1	1	1	0		2	1410
1	43	1	1	1	1	1	0	0	0	1	1	1	1	1	0		2	1411
1	47	1	0	1	1	1	0	0	0	1	1	1	1	1	0		2	1412
4	32	1	0	1	1	1	0	0	0	1	0	1	1	1	0		2	1413
1	32	1	0	1	1	1	0	0	0	1	0	1	1	1	0		2	1414
1	43	1	1	1	1	1	0	0	0	1	1	1	1	1	0		2	1415
2	63	1	1	0	1	1	0	0	0	1	0	0	0	0	0		1	1416
2	58	1	1	1	1	1	0	0	0	1	0	1	1	0	0		1	1417
2	60	0	1	0	1	1	0	0	0	1	0	0	1	0	0		1	1418
2	70	1	0	1	1	1	0	0	0	0	0	1	1	0	0		1	1419
2	78	1	1	1	1	1	0	0	0	1	0	0	1	0	0		1	1420
2	64	1	0	0	1	1	0	0	0	1	0	0	1	0	0		1	1421
2	63	1	0	1	1	1	0	0	0	1	0	1	0	0	0		1	1422
2	63	1	1	1	1	1	0	0	0	1	0	0	0	0	0		1	1423
2	53	1	0	0	1	1	0	0	0	1	0	0	0	1	0		1	1424
2	61	1	1	0	1	1	0	0	0	1	0	0	0	0	0		1	1425
2	69	1	1	1	1	1	0	0	0	0	0	0	0	1	0		1	1426
2	63	1	0	0	1	1	0	0	0	0	0	0	1	0	0		1	1427
2	39	1	1	0	0	1	0	0	0	1	0	0	1	0	0	1	1	1428
5	33	1	0	0	1	0	1	0	0	0	0	0	1	0	1		1	1429
2	34	1	0	1	1	0	1	0	0	0	0	0	1	0	0		1	1430
5	34	1	1	1	1	0	1	0	0	1	0	0	1	0	0		1	1431
5	47	1	0	1	0	0	0	0	0	1	0	0	0	1	0	1	3	1432
2	66	1	0	1	1	1	0	0	0	0	1	1	0	1	0		1	1433
2	61	1	0	1	0	1	0	0	0	1	0	0	0	1	0	1	1	1434
5	60	1	0	0	1	0	1	0	0	1	0	0	1	1	0		1	1435
5	60	0	0	1	1	0	1	0	0	1	0	0	1	1	0		1	1436
5	35	1	0	1	1	0	1	0	0	0	0	0	0	1	1		2	1437
5	33	0	0	0	1	0	1	0	0	0	0	0	0	0	0		2	1438
3	52	1	0	1	0	0	0	0	0	1	0	0	0	0	0	1	2	1439
2	49	1	0	1	1	0	0	0	0	1	0	1	0	1	0		2	1440
2	62	1	0	0	1	1	0	0	0	1	0	0	0	0	0		1	1441
2	59	1	1	1	1	1	0	0	0	1	0	0	1	0	0		1	1442
2	27	1	1	1	1	0	0	0	0	1	0	0	1	0	0		2	1443
5	71	1	0	0	1	0	0	0	0	1	0	0	0	1	0		1	1444
2	63	1	1	1	0	0	0	0	0	1	1	0	1	0	0	1	2	1445
2	55	1	0	1	1	0	0	0	0	1	1	0	0	1	0		2	1446
5	10	1	0	1	0	0	0	0	0	1	0	0	0	0	1	1	1	1447
2	41	1	0	0	1	0	0	0	0	1	0	0	0	0	0		2	1448
4	75	1	0	1	1	1	0	0	0	1	0	1	1	1	0		3	1449
5	52	1	0	0	1	0	0	0	0	1	0	1	0	1	0		1	1450
5	74	1	0	0	0	0	0	0	0	1	0	0	0	0	0	1	1	1451
5	58	1	0	0	0	0	0	0	0	1	0	0	0	0	0	1	2	1452
5	54	1	0	1	0	0	0	0	0	1	1	1	0	1	0	1	1	1453
2	58	1	0	0	1	1	0	0	0	0	0	0	0	1	1		2	1454
1	55	1	1	1	1	0	0	0	1	0	0	0	0	0	0		1	1455
2	64	1	1	1	1	1	0	0	0	1	1	0	1	0	0		1	1456
1	75	1	0	0	1	0	0	0	0	0	0	0	1	1	0		3	1457
5	22	1	0	1	0	0	0	0	0	1	0	0	0	0	0	1	3	1458
2	60	0	1	0	1	1	0	0	0	1	0	0	1	0	0		1	1459
1	33	1	0	0	0	0	0	0	0	1	0	0	1	1	0	1	3	1460
5	39	1	0	0	0	0	1	0	0	1	0	1	0	1	0	1	1	1461
2	41	1	0	0	0	0	0	0	0	1	0	0	1	1	0	1	1	1462
2	43	1	0	0	1	1	0	0	0	1	0	0	1	1	0		1	1463
2	23	1	0	1	0	0	0	0	0	0	0	0	1	0	0	1	2	1464
2	25	1	0	0	1	0	0	0	0	0	1	1	1	0	0		2	1465
1	40	1	0	1	0	0	0	1	0	0	0	0	0	1	1	1	2	1466
2	52	1	0	1	0	1	0	0	0	0	0	0	0	1	0	1	2	1467
2	66	1	0	1	1	0	0	0	0	1	0	0	0	0	0		1	1468
1	37	1	0	1	1	0	0	0	0	1	0	0	0	0	0		2	1469
5	31	1	0	0	1	0	0	0	0	1	0	0	0	0	0		2	1470
2	48	1	1	0	1	1	1	0	0	0	1	0	1	0	0		2	1471
2	64	1	0	0	1	0	0	0	0	1	0	0	0	0	1		1	1472
2	64	1	1	1	1	1	0	0	0	1	0	0	1	0	0		1	1473
1	31	1	0	1	0	0	0	0	0	1	0	1	0	0	0	1	2	1474
5	62	1	0	0	0	1	0	0	0	1	1	0	0	0	0	1	2	1475
2	66	1	0	0	0	0	0	0	0	0	0	0	1	0	0	1	1	1476
5	5	1	0	1	0	0	0	0	0	0	0	0	1	0	0	1	1	1477
5	2	1	0	1	1	0	0	0	0	1	0	0	0	0	0		1	1478
1	62	1	0	1	0	0	0	0	0	1	0	0	0	0	0	1	3	1479
2	55	0	0	0	1	1	0	0	0	1	0	0	1	0	0		1	1480
2	60	1	0	0	0	0	0	0	0	1	0	0	0	0	0	1	2	1481
5	12	1	0	1	0	0	1	0	0	1	0	0	1	1	0	1	1	1482
1	54	1	1	1	0	0	0	0	0	1	0	0	0	1	0	1	3	1483
5	68	0	1	0	1	0	1	0	0	1	0	0	1	1	0		2	1484
5	53	1	0	1	0	0	0	0	0	1	0	0	0	0	0	1	2	1485
3	43	1	0	0	0	0	0	0	0	1	0	0	0	1	0	1	2	1486
2	23	1	0	0	0	1	0	0	0	1	0	1	0	1	0	1	2	1487
5	78	1	0	0	0	0	0	0	0	1	1	1	0	1	0	1	1	1488
1	29	1	0	1	1	0	0	0	0	0	0	0	0	0	0		3	1489
5	28	1	0	0	1	0	0	0	0	0	0	0	0	0	0		3	1490
2	48	1	0	1	0	1	1	0	0	1	0	0	0	0	1	1	1	1491
2	63	1	1	1	0	1	0	0	0	1	0	0	1	0	0	1	2	1492
5	13	1	0	1	0	0	0	0	0	1	0	0	0	0	0	1	1	1493
2	56	1	0	1	0	0	0	0	0	1	1	0	0	0	1	1	2	1494
1	52	1	0	1	0	1	0	0	0	1	0	0	0	0	0	1	1	1495
1	20	1	0	1	0	0	0	0	0	1	1	0	0	1	0	1	3	1496
5	42	1	0	0	1	0	0	0	0	0	0	0	0	0	0		2	1497
3	46	1	1	1	1	0	0	1	0	1	1	0	0	1	0		2	1498
5	48	1	0	0	1	0	0	0	0	1	1	0	0	0	0		3	1499
2	49	1	0	1	0	1	0	0	0	1	0	0	0	0	0	1	1	1500
1	40	1	0	1	0	0	0	0	0	0	0	0	1	0	0	1	2	1501
1	56	1	0	1	0	0	0	0	0	1	0	0	0	0	0	1	3	1502
3	56	1	0	1	1	0	0	0	0	1	0	0	0	1	1		2	1503
5	43	1	0	1	1	0	1	0	0	1	0	0	0	0	0		2	1504
2	75	1	0	0	1	1	0	0	0	0	0	0	1	1	0		1	1505
1	30	1	0	1	0	0	0	0	0	1	0	0	0	0	0	1	2	1506
5	56	1	0	0	0	0	0	0	0	1	1	0	0	1	0	1	2	1507
5	67	1	0	0	0	0	0	0	0	1	0	0	0	1	0	1	1	1508
5	56	1	0	1	0	0	0	0	0	1	1	0	0	1	0	1	2	1509
1	35	1	0	1	0	0	0	0	1	0	0	0	1	0	0	1	2	1510
3	47	1	0	0	0	0	0	0	0	1	0	0	0	1	0	1	1	1511
2	55	1	0	1	0	0	0	0	0	1	0	0	1	1	0	1	1	1512
1	47	1	0	1	0	1	0	0	0	0	0	0	1	1	1	1	2	1513
2	35	1	0	1	1	1	1	0	0	1	0	0	0	0	0		2	1514
2	46	1	0	0	0	0	0	0	0	1	0	0	0	0	0	1	2	1515
5	61	1	0	1	1	0	1	0	0	1	0	0	1	0	0		2	1516
1	50	1	0	1	0	0	0	0	0	1	0	1	0	0	0	1	3	1517
5	15	1	0	1	0	0	0	0	0	1	0	0	0	0	0	1	3	1518
2	70	1	0	1	0	1	0	0	0	0	0	0	1	0	0	1	1	1519
5	69	1	0	0	0	0	0	0	0	1	0	0	0	0	0	1	2	1520
2	49	0	0	1	1	1	1	0	0	0	0	0	0	1	0		2	1521
2	49	1	0	1	1	1	0	0	0	0	0	0	1	0	0		2	1522
5	42	1	1	0	0	1	0	0	0	1	0	0	0	0	0	1	2	1523
2	46	1	0	1	1	1	0	0	0	1	0	0	0	1	0		1	1524
2	48	1	0	1	1	1	0	0	0	1	0	0	1	0	0		1	1525
2	49	1	0	1	1	1	0	0	0	1	0	0	1	1	0		1	1526
2	42	1	0	0	1	1	0	0	0	0	0	0	0	0	0		1	1527
2	46	1	1	1	1	1	0	0	0	0	0	1	1	0	0		1	1528
5	48	1	1	1	1	0	0	0	0	0	0	0	0	0	0		3	1529
1	42	1	0	1	1	1	0	0	0	0	0	0	1	0	0		2	1530
5	49	1	0	0	0	0	0	0	0	1	0	0	0	0	0	1	2	1531
2	42	1	1	1	1	1	0	0	0	1	1	0	1	1	0		1	1532
5	46	1	0	1	0	0	0	0	0	1	0	0	0	0	0	1	2	1533
1	48	1	0	1	0	0	0	0	0	0	0	0	0	0	1	1	1	1534
3	49	1	0	1	1	0	0	0	1	1	1	0	1	1	0		1	1535
5	42	1	0	0	1	0	1	0	0	0	0	1	1	1	0		1	1536
2	46	1	0	1	0	1	0	0	0	1	0	0	1	1	0	1	2	1537
2	48	1	0	0	0	0	0	0	0	1	0	0	1	0	0	1	2	1538
1	42	1	0	0	0	0	0	0	0	1	0	0	0	1	1	1	3	1539
5	49	1	0	0	1	0	0	0	1	1	0	0	0	1	0		3	1540
2	42	1	1	1	1	1	0	0	0	1	0	0	0	0	0		2	1541
2	46	1	0	1	1	1	0	0	0	1	0	0	0	0	0		1	1542
2	48	1	1	1	1	1	0	0	0	0	0	0	0	0	0		1	1543
2	49	1	1	1	1	1	0	0	0	1	0	0	0	0	0		1	1544
5	42	1	1	0	1	0	0	0	0	1	0	0	0	0	0		3	1545
2	46	1	0	0	1	0	0	0	0	1	0	0	0	0	0		1	1546
2	48	1	0	0	1	1	0	0	0	0	0	0	1	0	0		2	1547
2	42	1	0	1	1	1	0	0	0	0	0	0	0	1	0		2	1548
2	43	1	0	0	1	1	0	0	0	0	0	0	1	0	0		2	1549
2	28	1	1	1	1	1	0	0	0	1	0	0	0	0	0		3	1550
2	50	1	0	0	1	1	0	0	0	0	0	0	1	0	0		1	1551
2	60	1	0	1	1	1	0	0	0	1	0	0	0	0	0		1	1552
2	42	1	1	1	1	1	0	0	0	1	0	0	1	0	0		2	1553
2	60	1	0	0	1	1	0	0	0	0	0	0	0	1	0		2	1554
2	56	1	0	1	1	0	0	0	0	1	1	0	1	1	0		2	1555
2	79	1	0	1	1	0	0	0	0	1	1	0	0	1	0		1	1556
2	36	1	0	0	1	1	0	0	0	1	0	0	0	0	0		2	1557
2	46	1	0	1	1	0	0	1	0	1	0	0	0	0	0		2	1558
2	34	1	1	1	1	0	0	1	0	1	0	0	0	0	0		2	1559
2	29	1	0	1	1	0	0	1	0	0	0	0	0	0	0		2	1560
2	55	1	1	0	1	0	1	0	0	0	0	0	0	0	0		1	1561
2	53	1	1	1	1	0	0	1	0	0	0	0	0	0	0		1	1562
2	74	1	1	1	1	1	0	0	0	0	0	0	0	0	0		1	1563
2	52	1	1	1	1	0	0	1	0	0	0	0	0	0	0		2	1564
2	60	1	0	1	1	1	0	0	0	0	0	0	0	0	0		1	1565
2	40	1	1	1	1	0	0	1	0	0	0	0	0	0	0		2	1566
2	38	1	0	1	1	0	1	0	0	0	0	0	0	0	0		2	1567
2	56	1	0	1	1	1	0	0	0	0	0	0	0	0	0		2	1568
1	54	1	1	1	1	0	0	0	1	1	0	0	1	1	0		2	1569
2	56	1	0	0	1	1	0	0	0	1	0	1	1	1	0		2	1570
2	75	1	0	1	1	1	0	0	0	0	0	0	0	1	0		1	1571
2	72	1	0	0	1	1	0	0	0	0	0	0	0	0	0		1	1572
2	43	1	0	1	1	1	0	0	0	0	0	0	0	0	0		2	1573
2	32	1	0	0	1	1	0	0	0	0	0	0	0	0	0		2	1574
2	8	1	0	1	1	1	0	0	0	0	0	0	0	0	0		2	1575
2	31	1	0	1	1	1	0	0	0	0	0	0	0	0	0		2	1576
2	30	0	1	1	1	0	1	0	0	1	0	0	0	0	0		3	1577
2	36	0	0	1	1	0	1	0	0	0	0	0	0	0	0		2	1578
2	35	1	0	0	1	0	0	0	1	0	0	0	0	0	0		2	1579
5	13	0	0	1	1	0	0	0	0	0	0	0	0	0	0		2	1580
2	29	0	0	1	1	0	1	0	0	0	0	0	0	0	0		2	1581
2	28	1	0	0	1	0	0	0	1	0	0	0	0	0	0		2	1582
2	36	1	0	1	1	0	1	0	0	0	0	0	0	0	0		2	1583
2	35	0	0	0	1	0	0	0	1	0	0	0	0	0	0		2	1584
2	49	1	1	1	1	1	0	0	0	0	0	0	0	0	0		2	1585
5	42	0	0	1	1	0	1	0	0	1	0	0	0	0	0		1	1586
2	46	0	1	0	1	0	0	0	0	0	0	0	0	0	0		2	1587
3	48	1	0	1	1	1	0	0	0	0	0	0	0	0	0		2	1588
3	42	1	0	1	1	1	0	0	0	0	0	0	0	1	0		3	1589
1	49	1	0	1	1	0	0	1	0	0	0	0	0	0	1		2	1590
1	42	1	0	0	1	1	0	0	0	0	0	0	0	0	1		2	1591
2	60	1	0	1	1	1	0	0	0	0	0	0	0	0	0		3	1592
1	59	1	0	0	1	1	0	0	0	0	0	0	0	0	0		3	1593
4	49	1	1	1	1	1	0	0	0	0	0	0	1	1	0		2	1594
4	42	1	1	1	1	1	0	0	0	0	0	0	0	0	0		3	1595
1	46	1	0	1	1	0	0	1	0	0	0	0	0	0	0		1	1596
1	48	1	0	1	1	1	0	0	0	0	0	0	0	0	0		2	1597
1	42	1	0	1	1	1	0	0	0	0	0	0	0	0	0		2	1598
1	49	1	0	0	1	0	0	0	0	0	0	0	0	0	0		3	1599
1	42	1	0	1	1	1	0	0	0	0	0	0	0	0	0		3	1600
1	42	1	0	0	1	1	0	0	0	0	0	0	0	0	0		3	1601
1	49	1	0	1	1	1	0	0	0	0	0	0	0	0	0		2	1602
4	21	1	0	1	1	1	0	0	0	0	0	0	0	0	0		3	1603
1	37	1	0	1	1	1	0	0	0	0	0	0	0	0	0		3	1604
4	28	1	0	1	1	1	0	0	0	0	0	0	0	0	0		2	1605
2	36	1	0	1	1	0	0	0	0	1	0	0	1	0	0		2	1606
5	23	1	0	0	1	0	0	0	0	1	1	0	1	0	0		3	1607
2	39	1	0	0	1	1	0	0	0	0	0	0	0	1	0		2	1608
5	15	1	0	1	1	0	0	0	0	0	0	0	1	0	0		2	1609
2	57	1	1	1	1	1	0	0	0	1	0	0	0	0	0		1	1610
2	72	0	1	1	1	1	0	0	0	1	1	0	1	0	0		1	1611
2	63	0	0	1	1	1	0	0	0	1	0	0	0	1	0		2	1612
2	62	1	0	0	1	0	0	0	0	1	0	1	0	0	0		1	1613
2	65	1	1	1	1	1	0	0	0	1	0	1	0	0	0		1	1614
2	86	1	0	1	1	0	0	0	0	1	1	0	0	0	0		1	1615
2	73	1	0	1	1	1	0	0	0	1	0	0	0	1	0		1	1616
2	31	1	0	1	1	1	0	0	0	0	1	0	0	1	0		2	1617
1	48	1	0	1	0	0	0	0	0	0	0	0	1	0	0	1	1	1618
5	1.3	1	0	0	0	0	0	0	0	1	0	0	0	0	0	1	1	1619
2	63	1	0	1	1	0	0	0	0	1	0	0	1	1	0		2	1620
2	49	1	0	1	1	0	0	0	0	0	0	0	1	0	0		2	1621
5	42	1	0	0	0	0	0	0	0	1	0	0	0	0	0	1	1	1622
1	46	1	0	1	0	0	0	0	0	1	0	0	0	0	0	1	3	1623
5	48	1	0	1	0	0	0	0	0	1	0	0	0	1	0	1	3	1624
5	42	1	0	1	1	0	1	0	0	1	0	0	0	0	1		2	1625
1	49	1	0	1	1	1	0	0	0	1	0	0	1	1	0		3	1626
2	42	1	0	1	1	1	0	0	0	0	0	0	1	0	0		1	1627
2	46	1	0	0	0	0	0	0	0	1	0	0	0	0	0	1	1	1628
2	48	1	0	1	1	1	0	0	0	0	0	0	0	0	0		3	1629
2	49	1	0	1	1	1	0	0	0	0	0	0	1	1	0		2	1630
5	42	1	0	1	1	0	1	0	0	1	0	0	1	1	0		2	1631
5	46	1	0	1	1	1	0	0	0	0	0	0	0	1	1		2	1632
2	48	1	0	0	0	0	0	0	0	0	0	0	1	0	0	1	2	1633
2	42	1	0	1	0	1	0	0	0	1	0	0	0	0	0	1	2	1634
1	49	1	0	1	0	0	0	1	0	1	0	0	0	0	0	1	2	1635
2	42	1	0	0	1	1	0	0	0	1	1	0	1	1	1		1	1636
5	42	1	0	1	0	0	0	0	0	0	0	0	0	0	1	1	3	1637
5	49	1	0	0	0	0	0	0	0	1	0	0	0	0	0	1	1	1638
5	49	1	0	0	0	1	0	0	0	0	1	1	1	1	0	1	1	1639
2	42	1	0	0	0	0	0	0	0	1	0	0	1	1	0	1	2	1640
5	46	1	0	0	1	0	0	0	0	0	0	0	1	0	0		2	1641
5	48	1	0	0	1	0	0	0	0	0	0	0	0	0	0		2	1642
1	42	1	0	1	1	0	0	1	0	1	0	0	1	0	0		2	1643
5	49	1	0	1	0	0	0	0	0	1	0	0	0	0	0	1	2	1644
3	42	1	0	1	0	0	0	0	1	1	0	0	0	0	0	1	1	1645
5	46	1	0	0	0	0	0	0	0	1	0	0	0	0	0	1	3	1646
2	48	1	0	1	0	1	0	0	0	1	0	0	0	0	0	1	2	1647
1	49	1	0	1	0	0	0	0	0	1	0	0	1	1	0	1	3	1648
5	42	1	0	1	0	0	0	0	0	1	0	0	0	0	1	1	2	1649
2	46	0	0	0	1	1	0	0	0	1	0	0	1	0	0		1	1650
2	48	1	0	1	1	1	0	0	0	1	0	0	1	0	0		2	1651
2	42	1	0	0	1	1	0	0	0	1	0	0	1	0	0		1	1652
5	49	1	0	1	0	0	0	0	0	1	0	0	1	0	0	1	2	1653
5	42	1	0	0	0	0	0	0	0	1	0	0	0	0	0	1	3	1654
5	42	1	0	1	1	0	1	0	0	0	0	0	1	0	0		2	1655
5	49	1	0	0	1	1	0	0	0	0	0	0	1	0	0		3	1656
5	28	1	0	1	1	1	0	0	0	0	0	0	0	0	0		3	1657
2	1	1	0	1	0	1	0	0	0	1	0	0	0	0	0	1	2	1658
1	47	1	0	1	0	0	0	0	0	1	0	1	0	1	0	1	1	1659
2	64	1	0	1	0	1	0	0	0	1	0	0	0	0	0	1	1	1660
1	55	1	0	1	0	0	0	0	0	1	0	0	0	0	0	1	3	1661
5	56	1	0	1	0	0	0	0	0	1	0	0	0	0	0	1	2	1662
5	65	1	0	0	0	1	0	0	0	1	0	1	0	0	0	1	2	1663
2	59	1	0	0	0	1	0	0	0	0	0	1	1	0	0	1	2	1664
1	21	1	0	1	1	0	0	0	1	1	0	0	1	0	1		3	1665
1	32	1	0	1	1	1	0	0	0	0	0	0	0	0	0		3	1666
2	62	1	1	1	1	1	0	0	0	0	0	0	1	0	0		2	1667
2	67	1	1	0	1	1	0	0	0	1	0	0	1	1	0		2	1668
2	45	1	0	1	1	0	0	0	0	0	0	0	1	0	0		3	1669
2	61	1	0	0	1	0	0	0	0	1	0	0	0	0	0		1	1670
4	29	1	0	1	1	1	0	0	0	0	0	0	1	0	0		3	1671
2	34	1	0	1	0	1	0	0	0	0	0	0	1	0	0	1	3	1672
2	63	1	1	0	0	1	0	0	0	0	0	0	1	0	0	1	1	1673
5	34	0	1	1	1	0	1	0	0	1	1	0	1	1	0		2	1674
5	35	0	0	0	1	0	1	0	0	1	0	0	0	0	0		2	1675
5	46	1	0	1	1	0	1	0	0	0	0	1	1	1	0		2	1676
5	48	1	0	0	1	0	1	0	0	0	0	1	1	1	0		2	1677
1	74	1	0	1	0	1	0	0	0	1	0	0	1	1	0	1	2	1678
2	45	1	0	1	0	0	0	0	0	1	0	0	0	0	1	1	2	1679
5	36	1	0	1	1	0	0	0	0	1	0	0	0	0	1		3	1680
3	48	1	0	0	0	0	0	0	0	1	0	0	0	0	0	1	2	1681
2	55	1	1	1	1	0	0	0	0	1	0	0	1	0	0		2	1682
5	74	1	0	0	0	0	0	0	0	1	0	0	0	1	0	1	1	1683
2	52	1	0	1	0	1	0	0	0	1	0	0	0	0	0	1	1	1684
5	59	1	0	0	0	0	0	0	0	1	0	0	0	0	0	1	2	1685
3	33	1	0	1	0	0	0	0	0	1	0	0	0	1	0	1	2	1686
2	62	1	0	1	0	1	0	0	0	1	0	0	0	0	0	1	1	1687
2	33	1	0	1	0	1	0	0	0	1	1	0	0	0	0	1	2	1688
1	68	1	0	1	0	1	0	0	0	1	0	1	1	0	0	1	3	1689
5	28	0	0	0	1	0	0	0	0	1	0	0	0	0	0		3	1690
2	71	1	1	1	0	1	0	0	0	1	0	0	1	0	0	1	1	1691
1	49	1	0	1	0	0	0	0	1	0	0	0	1	0	0	1	2	1692
2	62	1	0	1	0	1	0	0	0	1	0	0	0	0	0	1	1	1693
5	25	1	0	1	1	0	1	0	0	0	0	1	0	0	0		2	1694
5	50	1	1	0	1	0	1	0	0	1	0	0	1	0	0		2	1695
5	69	1	0	1	0	1	0	0	0	1	0	0	0	1	0	1	3	1696
2	49	1	1	0	0	1	0	0	0	1	0	0	1	1	0	1	1	1697
5	42	1	0	0	0	0	0	0	0	1	0	0	0	0	0	1	2	1698
1	46	1	0	1	0	0	0	0	0	0	0	0	0	0	1	1	2	1699
2	48	1	1	1	0	1	0	0	0	1	0	0	1	0	0	1	1	1700
2	42	1	0	0	1	1	0	0	0	1	0	0	1	0	0		2	1701
1	49	1	0	0	0	0	0	0	0	1	0	0	0	0	0	1	1	1702
5	42	0	0	1	1	1	0	0	0	1	1	0	0	1	0		2	1703
2	46	0	0	1	1	1	0	0	0	0	0	0	0	0	0		3	1704
5	48	1	0	1	0	0	0	0	0	1	0	0	0	1	0	1	3	1705
5	49	1	0	0	0	0	0	0	0	1	0	0	0	1	0	1	2	1706
5	42	1	0	0	1	0	1	0	0	1	0	1	1	0	0		1	1707
5	46	1	0	1	1	0	1	0	0	0	0	0	0	0	0		2	1708
5	48	1	0	0	1	0	1	0	0	1	0	1	1	0	0		2	1709
5	42	1	0	1	0	1	0	0	0	0	0	0	0	0	1	1	3	1710
5	49	1	0	0	0	0	0	0	0	1	0	0	0	0	0	1	2	1711
3	42	1	0	1	0	0	0	0	0	1	0	0	0	0	0	1	3	1712
1	42	1	0	1	0	0	0	0	0	1	0	0	0	0	0	1	3	1713
2	49	1	0	1	0	0	0	0	0	1	0	0	0	0	0	1	3	1714
5	33	1	0	1	1	0	1	0	0	1	1	1	1	1	0		3	1715
2	29	1	0	0	1	0	0	0	0	1	1	0	0	1	0		2	1716
2	32	1	0	1	1	0	0	0	0	0	1	1	1	1	0		2	1717
2	75	1	1	1	1	1	0	0	0	0	0	0	0	1	0		1	1718
2	42	1	1	1	1	1	0	0	0	0	0	0	1	0	0		2	1719
1	45	1	0	1	1	0	0	0	0	0	0	0	0	0	0		3	1720
4	40	1	0	1	1	1	0	0	0	0	0	0	0	0	0		3	1721
1	51	1	0	1	1	1	0	0	0	0	0	0	0	0	0		1	1722
1	59	1	0	0	1	0	0	0	0	0	0	0	0	0	0		3	1723
1	36	1	0	0	1	1	0	0	0	0	0	0	0	0	0		3	1724
1	43	1	0	1	1	1	0	0	0	0	0	0	0	0	0		3	1725
1	30	1	0	0	1	1	0	0	0	0	0	0	0	0	0		2	1726
5	37	1	0	1	1	1	0	0	0	0	0	0	0	0	0		3	1727
5	43	1	0	1	1	1	0	0	0	0	0	0	0	0	0		3	1728
1	23	1	0	0	1	1	0	0	0	0	0	0	0	0	0		3	1729
2	44	1	0	1	1	1	0	0	0	0	0	0	0	0	0		2	1730
1	38	1	0	1	1	1	0	0	0	0	0	0	0	0	0		3	1731
1	50	1	0	1	1	0	0	0	0	0	0	0	0	0	0		1	1732
1	32	1	0	0	1	1	0	0	0	0	0	0	0	0	0		3	1733
4	36	1	0	1	1	1	0	0	0	0	0	0	0	0	0		3	1734
4	24	1	0	1	1	1	0	0	0	0	0	0	0	0	0		3	1735
1	37	1	0	1	1	1	0	0	0	0	0	0	0	0	0		2	1736
2	29	1	0	1	1	0	1	0	0	1	0	0	1	0	0		3	1737
2	51	1	1	1	1	1	0	0	0	1	0	0	0	1	0		2	1738
2	64	1	0	1	1	1	0	0	0	1	0	1	0	0	0		2	1739
1	31	1	0	1	1	0	0	0	0	1	0	1	0	0	0		3	1740
2	78	1	0	1	1	0	0	0	0	1	0	0	0	1	0		1	1741
2	43	1	0	0	1	0	0	0	0	1	1	0	1	0	0		3	1742
2	29	1	0	1	1	0	0	0	0	1	1	0	0	0	0		2	1743
2	73	0	1	0	1	1	0	0	0	1	0	1	0	0	0		1	1744
2	50	0	1	1	1	1	0	0	0	1	0	1	0	0	0		1	1745
2	28	0	0	0	1	1	0	0	0	0	0	1	1	1	0		3	1746
2	52	1	0	0	1	1	0	0	0	1	0	1	1	0	0		1	1747
2	66	1	0	1	1	1	0	0	0	1	0	0	1	1	0		1	1748
5	5	1	0	0	0	1	0	0	0	1	0	0	0	0	0	1	1	1749
2	28	1	0	0	0	1	0	0	0	1	0	0	0	0	0	1	1	1750
5	28	1	0	1	0	0	0	0	0	1	1	0	0	0	0	1	3	1751
5	28	1	0	0	0	0	0	0	0	1	1	0	0	0	1	1	3	1752
3	51	1	0	0	1	0	0	0	1	1	0	0	1	0	0		1	1753
2	38	1	0	1	0	0	0	0	0	1	1	0	0	0	1	1	2	1754
5	54	1	0	0	0	0	0	0	0	1	0	1	0	1	0	1	2	1755
5	60	1	1	0	1	0	0	0	0	1	1	0	0	0	0		2	1756
5	72	1	0	0	1	0	0	0	0	1	0	0	0	0	1		2	1757
5	43	1	0	0	1	1	0	0	0	0	0	0	1	0	0		2	1758
1	23	1	0	0	0	1	0	0	0	1	0	0	0	0	0	1	3	1759
2	26	1	0	1	0	0	0	0	0	1	0	0	0	0	0	1	1	1760
2	75	1	0	0	0	0	0	0	0	1	0	0	0	0	0	1	1	1761
5	23	1	0	0	1	0	0	0	0	1	0	0	0	0	1		2	1762
2	44	1	0	1	0	0	0	0	0	1	0	0	1	1	0	1	2	1763
5	47	1	1	1	0	1	0	0	0	1	1	0	1	0	0	1	2	1764
5	53	1	1	1	1	0	1	0	0	0	0	0	0	0	0		1	1765
5	64	1	0	1	1	0	0	0	0	1	0	0	0	0	0		2	1766
5	51	1	0	1	0	0	0	0	0	0	0	0	0	0	1	1	1	1767
1	26	1	0	0	0	0	0	0	0	0	0	0	1	0	0	1	3	1768
2	69	1	0	0	0	0	0	0	0	1	0	0	0	0	0	1	1	1769
2	53	1	1	0	0	0	0	0	0	1	0	0	1	0	0	1	2	1770
3	42	0	0	1	1	0	0	0	1	0	0	0	0	0	0		1	1771
1	54	1	1	1	0	0	0	0	0	1	0	0	1	0	0	1	3	1772
5	33	1	1	1	0	0	1	0	0	0	0	0	1	0	0	1	3	1773
5	11	1	0	0	1	1	0	0	0	1	0	0	0	0	1		1	1774
1	30	1	0	0	0	0	0	0	0	1	0	0	0	0	0	1	3	1775
2	73	1	1	1	1	1	0	0	0	1	0	0	1	1	0		1	1776
5	31	1	1	1	1	0	1	0	0	1	0	0	1	0	0		3	1777
2	57	1	1	1	1	0	0	0	0	1	1	0	1	1	0		2	1778
5	64	1	1	0	1	0	1	0	0	1	0	0	1	0	0		1	1779
2	62	1	0	1	0	1	0	0	0	1	0	1	1	0	0	1	1	1780
2	64	1	0	1	0	1	0	0	0	1	0	0	1	0	0	1	2	1781
5	40	1	0	1	1	0	0	0	0	0	0	0	0	0	0		2	1782
2	35	1	1	0	1	1	0	0	0	1	0	0	0	0	0		2	1783
5	41	1	0	1	1	0	0	0	0	1	0	0	0	1	0		2	1784
5	46	1	0	0	0	0	0	0	0	1	0	0	0	0	0	1	3	1785
2	63	1	1	0	0	1	0	0	0	1	1	0	1	1	0	1	1	1786
5	46	1	1	1	1	0	1	0	0	0	0	0	1	0	0		1	1787
5	46	1	0	0	1	0	1	0	0	0	0	0	1	0	0		1	1788
5	69	1	0	0	0	0	0	0	0	1	1	0	1	0	0	1	1	1789
3	29	1	0	1	1	0	0	0	1	1	1	1	0	0	0		3	1790
1	61	1	0	0	0	0	0	0	0	1	0	0	1	0	0	1	2	1791
2	62	1	0	1	0	1	0	0	0	0	0	0	1	0	0	1	1	1792
5	36	1	0	1	1	0	1	0	0	0	0	0	0	0	1		3	1793
1	27	1	0	1	0	0	0	0	0	1	0	0	0	0	0	1	3	1794
4	54	1	1	1	0	1	0	0	0	0	0	1	0	0	0	1	3	1795
4	50	1	1	0	1	1	0	0	0	0	0	0	0	0	0		2	1796
1	50	1	0	0	0	0	0	0	1	1	1	0	0	0	0	1	2	1797
2	35	1	0	1	0	0	0	0	0	1	0	0	0	0	0	1	2	1798
3	47	1	0	1	0	0	0	0	0	1	0	1	0	0	0	1	2	1799
2	45	1	1	0	0	1	0	0	0	1	0	0	0	0	1	1	2	1800
1	46	1	0	1	0	0	0	0	0	0	0	0	1	0	0	1	1	1801
2	62	1	1	1	1	1	0	0	0	0	0	1	1	1	0		2	1802
2	38	1	0	0	0	0	0	0	0	1	1	0	0	0	0	1	3	1803
1	31	1	0	1	0	0	0	0	0	1	0	0	0	0	0	1	3	1804
1	59	1	1	0	1	0	0	0	1	1	1	0	1	0	0		1	1805
3	23	1	1	1	0	0	0	1	0	0	0	0	0	0	1	1	2	1806
1	44	1	0	1	0	0	0	0	0	1	1	0	0	0	0	1	3	1807
3	34	1	0	1	1	0	0	1	0	0	0	0	1	1	0		2	1808
2	58	1	0	0	1	1	0	0	0	1	0	0	0	1	0		1	1809
2	74	1	0	1	0	1	0	0	0	0	0	0	1	0	0	1	1	1810
5	72	1	0	0	0	0	0	0	0	1	0	0	0	0	0	1	1	1811
5	76	1	0	1	0	0	0	0	0	0	0	0	1	0	0	1	3	1812
2	68	1	0	1	0	1	0	0	0	1	0	0	0	1	0	1	1	1813
2	75	1	0	0	0	0	0	0	0	1	0	0	0	0	0	1	1	1814
5	65	1	1	1	0	1	0	0	0	0	0	0	0	0	1	1	1	1815
2	54	1	0	1	1	1	0	0	0	0	0	0	1	1	1		3	1816
5	44	0	0	1	1	0	1	0	0	0	0	0	1	1	0		1	1817
5	50	1	0	0	0	0	0	0	0	1	0	1	0	0	0	1	3	1818
1	35	1	0	0	1	0	0	0	0	1	0	0	0	0	0		2	1819
1	64	1	0	1	1	0	0	0	0	0	0	0	1	0	0		3	1820
2	66	1	0	1	0	0	0	0	0	1	0	0	0	0	0	1	1	1821
5	33	1	0	1	1	0	1	0	0	1	1	1	1	1	0		3	1822
2	29	1	0	0	1	0	0	0	0	1	1	0	0	1	0		2	1823
2	32	1	0	1	1	0	0	0	0	0	1	1	1	1	0		2	1824
2	51	1	1	1	1	1	0	0	0	0	0	0	0	1	0		1	1825
2	33	1	0	1	1	1	1	0	0	1	1	0	1	0	0		2	1826
1	37	1	0	1	1	1	0	0	0	0	0	0	0	0	1		2	1827
1	48	1	0	1	1	1	0	0	0	0	0	0	0	1	0		3	1828
1	36	1	0	0	1	1	0	0	0	0	0	0	1	1	0		2	1829
1	47	1	0	0	1	1	0	0	0	0	0	0	0	0	0		2	1830
1	52	1	0	1	1	0	0	1	0	0	0	0	0	0	0		2	1831
1	39	1	0	1	1	0	0	0	0	0	0	0	0	0	0		2	1832
1	46	1	0	0	1	1	0	0	0	0	0	0	0	0	0		1	1833
1	45	1	0	0	1	1	0	0	0	0	0	0	0	0	0		1	1834
1	27	1	0	1	1	1	0	0	0	0	0	0	0	0	0		2	1835
1	34	1	0	1	1	1	0	0	0	0	0	0	0	0	0		3	1836
1	31	1	0	0	1	1	0	0	0	0	0	0	0	0	0		3	1837
1	52	1	0	1	1	0	0	1	0	0	0	0	0	0	0		2	1838
1	44	1	0	1	1	0	0	1	0	0	0	0	0	0	0		2	1839
1	54	1	0	1	1	0	0	1	0	0	0	0	0	0	0		2	1840
1	51	1	0	1	1	0	0	1	0	0	0	0	0	0	0		2	1841
1	46	1	0	1	1	0	0	0	0	0	0	0	0	0	0		2	1842
1	38	1	0	1	1	1	0	0	0	0	0	0	0	0	0		2	1843
1	23	1	0	0	1	1	0	0	0	0	0	0	0	0	0		3	1844
1	38	1	0	0	1	0	0	0	0	1	1	0	0	1	0		3	1845
2	72	1	0	1	1	1	0	0	0	1	0	0	0	1	0		1	1846
2	22	1	0	0	1	1	0	0	0	1	0	0	1	0	0		2	1847
2	30	1	0	0	1	0	0	0	0	1	0	0	1	1	0		3	1848
2	64	1	0	0	1	1	0	0	0	1	0	0	0	1	0		1	1849
2	66	1	1	1	0	1	0	0	0	0	0	0	1	1	0	1	3	1850
2	88	1	1	1	1	1	0	0	0	1	0	0	1	1	0		1	1851
5	50	1	0	0	0	0	1	0	0	0	0	0	1	1	0	1	2	1852
5	19	1	0	0	0	0	0	0	0	1	0	0	0	0	1	1	3	1853
2	63	1	0	0	1	0	0	0	0	0	0	0	1	0	0		2	1854
2	66	0	1	1	1	0	0	0	0	0	0	0	1	0	0		2	1855
5	74	1	0	1	0	0	0	0	0	1	0	0	0	0	0	1	3	1856
2	49	1	0	1	0	0	0	0	0	1	0	0	0	0	0	1	2	1857
5	42	1	0	0	0	0	0	0	0	1	0	0	0	0	0	1	1	1858
2	46	1	0	0	0	0	0	0	0	1	0	0	0	0	0	1	2	1859
1	48	1	0	1	0	0	0	1	0	0	0	0	1	0	0	1	3	1860
2	42	0	0	0	1	0	0	0	0	1	0	0	0	0	0		2	1861
2	49	1	0	0	1	0	0	0	0	0	1	0	0	0	0		2	1862
1	42	1	0	1	1	0	0	1	0	0	0	0	1	1	0		2	1863
2	46	1	0	0	1	1	0	0	0	0	0	0	1	1	0		2	1864
1	48	1	0	0	1	0	0	0	0	1	0	0	1	0	1		2	1865
1	49	1	0	0	0	0	0	0	0	1	0	0	1	0	0	1	3	1866
5	42	1	1	1	1	1	0	0	0	0	1	1	0	0	0		1	1867
2	46	1	0	0	0	0	0	0	0	1	1	0	0	0	0	1	3	1868
2	48	1	0	0	0	0	0	0	0	1	0	0	0	0	0	1	1	1869
1	42	1	0	0	0	0	0	0	0	1	0	1	1	0	0	1	3	1870
5	49	1	0	0	1	0	0	0	0	1	0	0	1	1	0		3	1871
2	42	1	0	0	1	1	0	0	0	1	0	1	0	1	0		1	1872
2	42	1	0	1	1	1	0	0	0	0	0	0	0	1	0		2	1873
5	49	1	0	0	0	0	0	0	0	1	0	0	0	0	0	1	2	1874
5	29	1	0	0	0	0	0	0	0	1	0	0	1	0	1	1	2	1875
1	29	1	0	1	0	1	0	0	0	1	0	0	0	0	0	1	2	1876
1	49	1	0	0	1	0	0	0	1	0	1	1	1	1	0		1	1877
5	42	1	1	1	0	0	0	0	0	1	0	0	1	0	0	1	1	1878
5	46	1	0	0	0	0	0	0	0	1	0	1	0	1	0	1	1	1879
1	48	1	0	1	1	0	0	0	0	1	1	1	1	0	0		3	1880
5	42	1	0	0	1	0	0	0	0	0	0	1	0	0	0		2	1881
1	49	1	0	0	0	1	1	0	0	0	0	0	1	1	0	1	2	1882
1	42	1	0	1	0	0	0	0	0	1	0	0	0	0	0	1	3	1883
5	46	1	0	1	1	0	1	0	0	1	0	0	0	1	0		2	1884
1	48	1	0	1	0	0	0	0	0	1	0	0	0	0	0	1	3	1885
2	49	1	0	1	0	1	0	0	0	1	0	0	0	1	0	1	1	1886
1	42	1	0	1	0	0	0	1	0	1	0	1	1	0	0	1	2	1887
1	66	1	0	0	0	0	0	0	0	1	0	1	0	0	0	1	3	1888
2	48	1	0	0	0	0	0	0	0	1	0	1	0	1	0	1	2	1889
2	42	1	0	0	0	0	0	0	0	1	0	0	0	1	0	1	1	1890
1	49	1	1	1	0	0	0	0	1	1	1	1	1	1	0	1	2	1891
2	42	1	0	1	1	1	0	0	0	1	0	0	0	0	0		2	1892
2	42	1	0	1	1	1	0	0	0	1	0	0	0	0	0		2	1893
2	49	1	0	1	1	1	0	0	0	1	0	0	0	0	0		2	1894
2	62	1	0	0	0	1	0	0	0	1	1	1	1	1	0	1	1	1895
2	7	1	0	1	1	1	0	0	0	1	0	0	0	0	0		1	1896
5	31	1	0	0	0	0	0	0	0	1	0	0	0	0	0	1	2	1897
1	42	1	1	1	0	0	0	0	1	1	0	1	1	1	0	1	1	1898
2	75	1	0	1	1	1	0	0	0	1	0	0	0	0	0		3	1899
5	32	1	0	0	0	0	0	0	0	1	1	0	0	0	0	1	2	1900
2	70	1	0	0	0	0	0	0	0	1	0	0	0	0	0	1	1	1901
5	60	1	0	0	0	1	0	0	0	1	0	0	1	0	0	1	1	1902
5	46	1	1	1	1	0	1	0	0	1	0	1	1	0	0		1	1903
2	55	1	0	0	1	0	0	0	0	1	0	0	0	0	0		2	1904
5	56	1	0	1	0	0	0	0	0	1	1	0	1	0	0	1	2	1905
2	69	1	1	0	0	1	0	0	0	1	1	0	1	0	0	1	1	1906
2	66	1	1	1	1	1	0	0	0	1	1	0	0	1	0		1	1907
2	68	1	0	1	1	1	0	0	0	1	0	0	1	0	0		1	1908
2	68	1	1	0	1	1	0	0	0	1	0	0	0	0	0		1	1909
5	19	1	0	1	1	0	0	0	0	1	0	0	0	0	0		1	1910
4	28	1	0	1	1	1	0	0	0	0	0	0	1	1	0		3	1911
5	20	0	0	0	1	0	0	0	0	0	0	0	0	0	0		3	1912
2	66	1	0	1	1	0	0	0	0	1	0	0	0	1	0		1	1913
2	59	1	0	0	1	0	0	0	0	0	0	1	1	0	1		1	1914
2	67	1	1	1	1	0	0	0	0	1	0	1	1	1	0		1	1915
2	53	1	0	1	1	0	0	0	0	1	1	0	1	0	0		1	1916
2	58	1	0	1	1	0	0	0	0	1	0	1	1	0	0		1	1917
2	54	1	0	1	0	1	0	0	0	1	1	0	0	0	1	1	2	1918
3	48	1	1	1	1	0	0	0	1	1	0	0	0	0	0		3	1919
2	51	1	1	0	1	1	0	0	0	1	1	1	1	1	0		1	1920
2	16	1	0	1	1	1	0	0	0	1	1	1	1	1	0		3	1921
2	62	1	1	0	0	1	0	0	0	0	1	1	0	1	0	1	1	1922
2	74	1	0	1	1	1	0	0	0	1	0	0	0	0	0		2	1923
2	66	1	1	0	1	1	0	0	0	0	0	0	1	0	0		1	1924
2	56	1	1	1	1	1	0	0	0	1	1	1	0	0	0		2	1925
2	40	1	0	0	1	1	0	0	0	1	0	0	0	0	0		2	1926
2	65	1	0	1	1	1	0	0	0	1	1	1	0	0	0		1	1927
2	48	1	0	1	1	0	0	0	0	1	0	0	1	0	0		2	1928
2	68	1	1	0	1	1	0	0	0	1	0	0	0	0	0		1	1929
2	46	1	0	1	1	0	0	0	0	0	0	1	1	0	0		1	1930
2	49	1	0	1	1	0	0	0	0	1	1	0	1	0	0		2	1931
1	41	1	0	1	1	0	0	0	0	1	0	0	0	0	0		2	1932
2	68	1	0	0	1	1	0	0	0	1	1	0	1	0	0		1	1933
2	65	1	0	0	1	1	0	0	0	1	0	0	0	0	0		1	1934
2	74	1	0	1	1	1	0	0	0	0	0	1	1	0	0		1	1935
2	37	1	0	1	1	1	0	0	0	1	0	0	0	1	0		2	1936
1	50	1	0	1	1	0	1	0	0	1	0	1	0	0	0		1	1937
4	60	1	0	1	1	1	0	0	0	0	0	0	1	1	0		3	1938
2	43	1	0	1	1	0	0	0	0	1	0	0	1	1	0		2	1939
2	48	1	0	1	1	0	0	0	0	1	0	0	1	1	0		2	1940
2	46	1	0	1	1	0	0	0	0	0	0	0	1	1	0		2	1941
1	41	1	0	0	1	0	0	0	0	0	0	0	0	0	0		2	1942
1	40	1	0	1	1	0	0	0	0	0	0	0	1	1	0		2	1943
1	59	1	0	1	1	0	0	0	0	0	0	0	0	0	0		3	1944
1	56	1	0	1	1	0	0	0	0	0	0	0	0	0	0		3	1945
1	29	1	0	1	1	0	0	0	0	0	0	0	0	0	0		2	1946
1	31	1	0	1	1	0	0	0	0	0	0	0	0	0	0		2	1947
2	53	1	0	0	0	0	0	0	0	1	0	1	0	0	0	1	3	1948
1	40	1	0	1	1	0	0	1	0	1	0	0	0	0	0		1	1949
2	74	1	0	0	1	0	0	0	0	1	0	0	0	0	0		1	1950
2	65	1	0	0	1	0	0	0	0	1	0	0	0	0	0		2	1951
2	47	1	0	0	0	0	0	0	0	1	0	0	0	0	0	1	2	1952
1	49	1	0	1	0	0	0	0	0	1	0	0	1	0	0	1	3	1953
5	42	1	0	1	1	0	1	0	0	1	1	0	1	0	0		2	1954
5	46	1	0	0	1	0	0	0	0	1	0	0	0	0	0		2	1955
2	48	1	0	0	0	0	0	0	0	1	0	0	1	0	0	1	3	1956
2	42	1	1	1	1	1	0	0	0	0	0	1	1	0	0		1	1957
5	49	1	0	0	1	0	1	0	0	0	0	0	0	0	1		2	1958
5	42	1	0	0	1	0	0	0	0	0	0	1	0	0	0		1	1959
3	46	1	0	0	1	0	0	0	1	1	0	1	0	0	0		1	1960
5	48	1	0	1	0	0	0	0	0	1	1	1	0	1	0	1	3	1961
2	49	1	0	0	0	1	0	0	0	1	0	0	0	0	1	1	1	1962
2	42	1	0	1	1	1	1	0	0	0	0	0	1	1	0		3	1963
2	46	1	0	1	1	1	1	0	0	0	0	0	1	0	0		3	1964
5	48	1	0	0	1	0	1	0	0	0	0	0	1	0	0		1	1965
2	42	1	0	1	1	0	0	0	0	1	0	0	0	0	0		2	1966
2	49	1	0	0	0	0	0	0	0	1	0	0	0	0	0	1	1	1967
5	42	0	0	1	0	0	0	0	0	1	0	0	0	0	0	1	1	1968
5	42	1	1	0	0	0	0	0	0	1	1	1	0	0	0	1	2	1969
2	49	1	0	1	0	0	0	0	0	1	1	0	0	0	0	1	2	1970
2	55	1	0	1	0	0	0	0	0	1	1	0	1	1	0	1	1	1971
2	49	1	0	0	0	0	0	0	0	1	1	1	1	0	0	1	1	1972
2	42	1	0	0	0	0	0	0	0	1	0	1	0	0	0	1	2	1973
5	46	1	0	0	1	0	0	0	0	1	1	0	0	0	0		2	1974
5	48	1	0	1	0	0	0	0	0	1	0	0	0	0	0	1	3	1975
1	42	1	0	1	0	0	0	1	0	1	0	1	0	0	0	1	2	1976
2	49	1	1	1	1	0	0	0	0	1	0	1	0	0	0		1	1977
3	42	1	0	0	0	0	0	0	0	1	0	0	0	0	0	1	2	1978
1	46	1	0	1	1	0	0	0	0	1	0	0	0	0	0		2	1979
2	48	1	1	0	1	0	0	0	0	1	0	0	0	0	0		1	1980
5	49	1	0	1	0	0	0	0	0	1	1	1	0	1	0	1	3	1981
2	42	1	0	0	0	0	0	0	0	1	0	1	1	0	0	1	1	1982
2	46	1	1	1	0	1	0	0	0	0	0	0	1	0	0	1	2	1983
2	48	1	0	1	0	1	0	0	0	0	0	1	0	1	0	1	1	1984
2	42	1	0	0	0	1	0	0	0	1	1	1	1	1	0	1	2	1985
5	49	1	0	1	0	1	0	0	0	1	0	0	0	0	1	1	2	1986
2	42	1	0	1	1	1	0	0	0	1	1	1	1	0	0		2	1987
2	42	1	0	1	1	1	0	0	0	0	0	0	1	1	0		2	1988
2	49	1	0	0	0	0	0	0	0	1	0	0	0	0	1	1	1	1989
3	62	1	0	0	0	0	0	0	0	1	0	1	0	0	0	1	3	1990
1	22	1	0	0	0	0	0	0	0	1	0	1	1	0	0	1	3	1991
3	45	1	0	0	0	0	0	0	0	1	0	0	0	0	0	1	3	1992
3	64	1	0	1	0	0	0	0	0	1	0	1	0	1	1	1	1	1993
2	51	1	0	1	0	0	0	0	0	1	0	0	0	1	0	1	1	1994
2	58	1	0	0	0	0	0	0	0	1	0	0	0	0	0	1	1	1995
1	42	1	0	1	0	0	0	0	0	1	0	0	1	0	0	1	2	1996
2	72	1	1	1	1	0	0	0	0	1	0	0	0	0	0		1	1997
2	32	1	0	1	0	0	0	0	0	1	0	0	0	0	0	1	2	1998
2	45	1	0	1	0	0	0	0	0	1	0	0	0	0	1	1	2	1999
[truncated: 249 more rows]

## Sheet: Sheet2
variety	note1	note2	note3	note4	note5
career	1Famer	2Worker	3Children/Student	4Veterinarian	5Other
age	years
Ethnicity	1Han	0Hui
HB	1Yes	0No
sex	1man	0femal
group	1Active detection group	0Passive detection group
cultivation	1Yes	0No
slaughter	1Yes	0No
selling	1Yes	0No
process	1Yes	0No
Fever	1Yes	0No
Arthralgia	1Yes	0No
Debilitation	1Yes	0No
Hyperhidrosis	1Yes	0No
Muscle pain	1Yes	0No
Other	1Yes	0No
passivegroup	1From hospital in passivegroup	0From CDC in passivegroup
education	1Under junior middle school	2Junior middle school	3Above junior middle school
id	number
